# Supplementary material for: The Src–ZNRF1 axis controls TLR3 trafficking and interferon responses to limit lung barrier damage
Source: PubMed Central journal article supplement (PMC10174191; doi:10.1084/jem.20220727), 2023-05-09

# Source Data Figure 8C

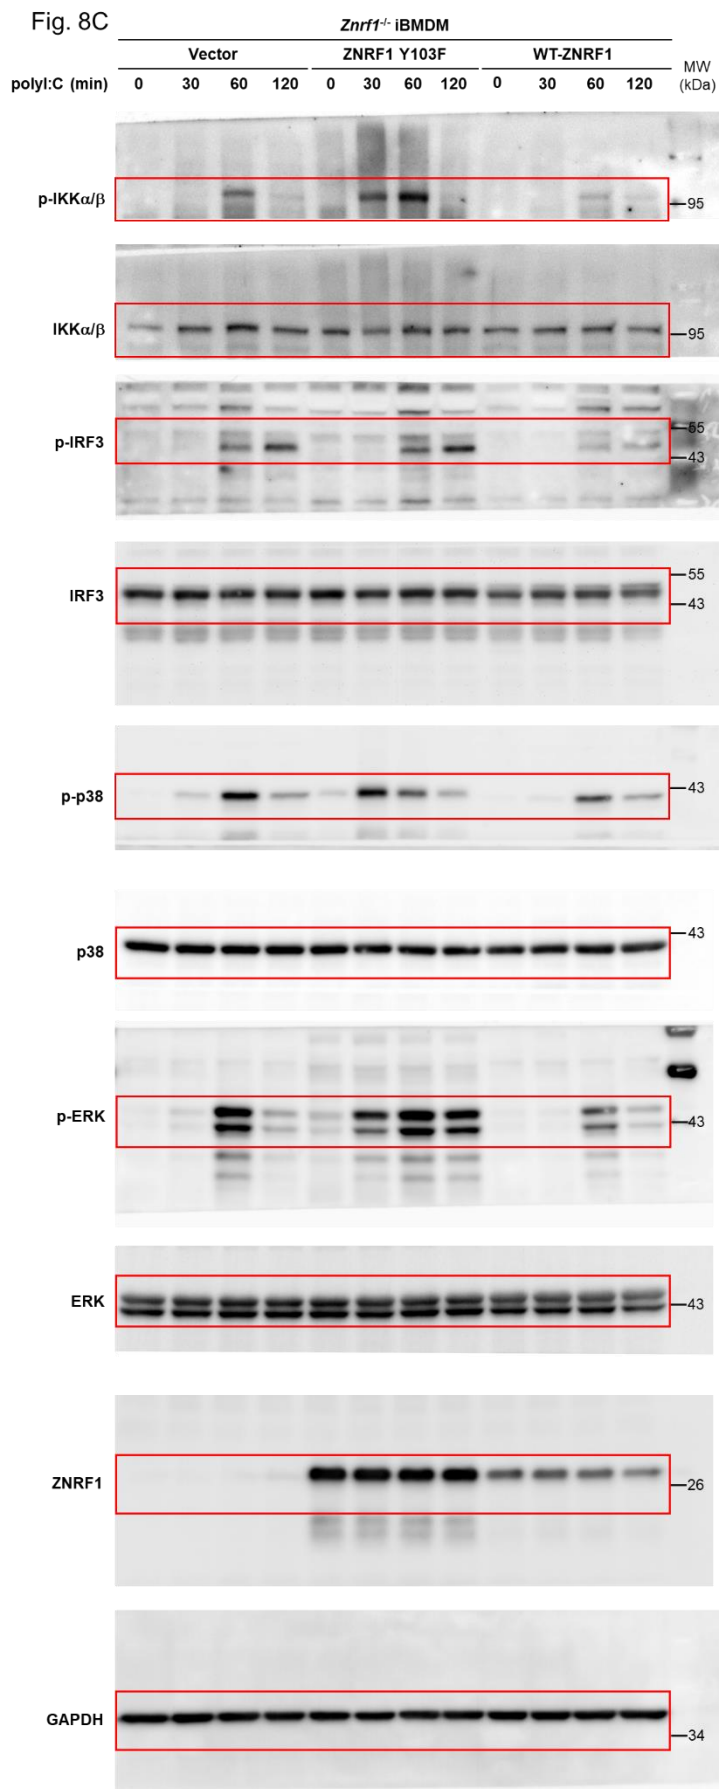

Source Data Figure 8D

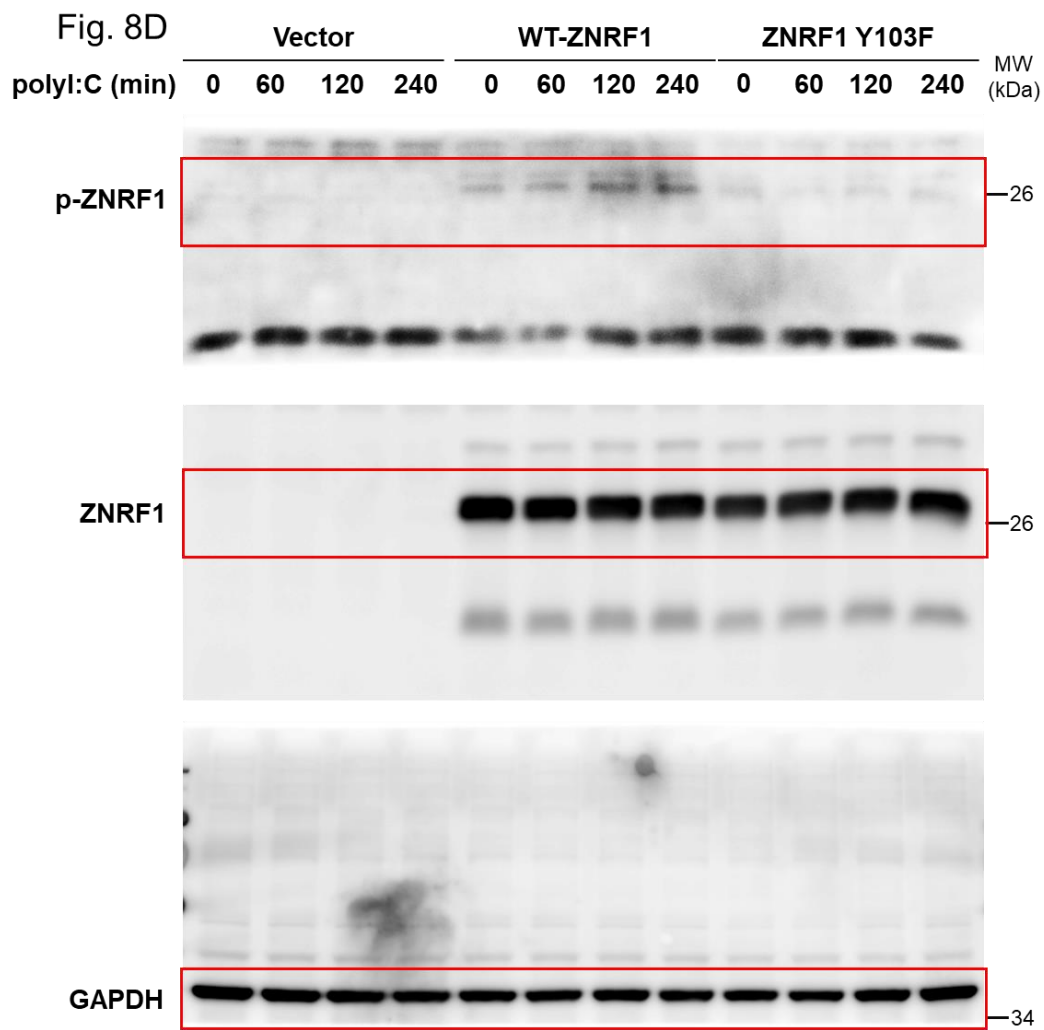

# Source Data Figure 8E

Fig. 8E

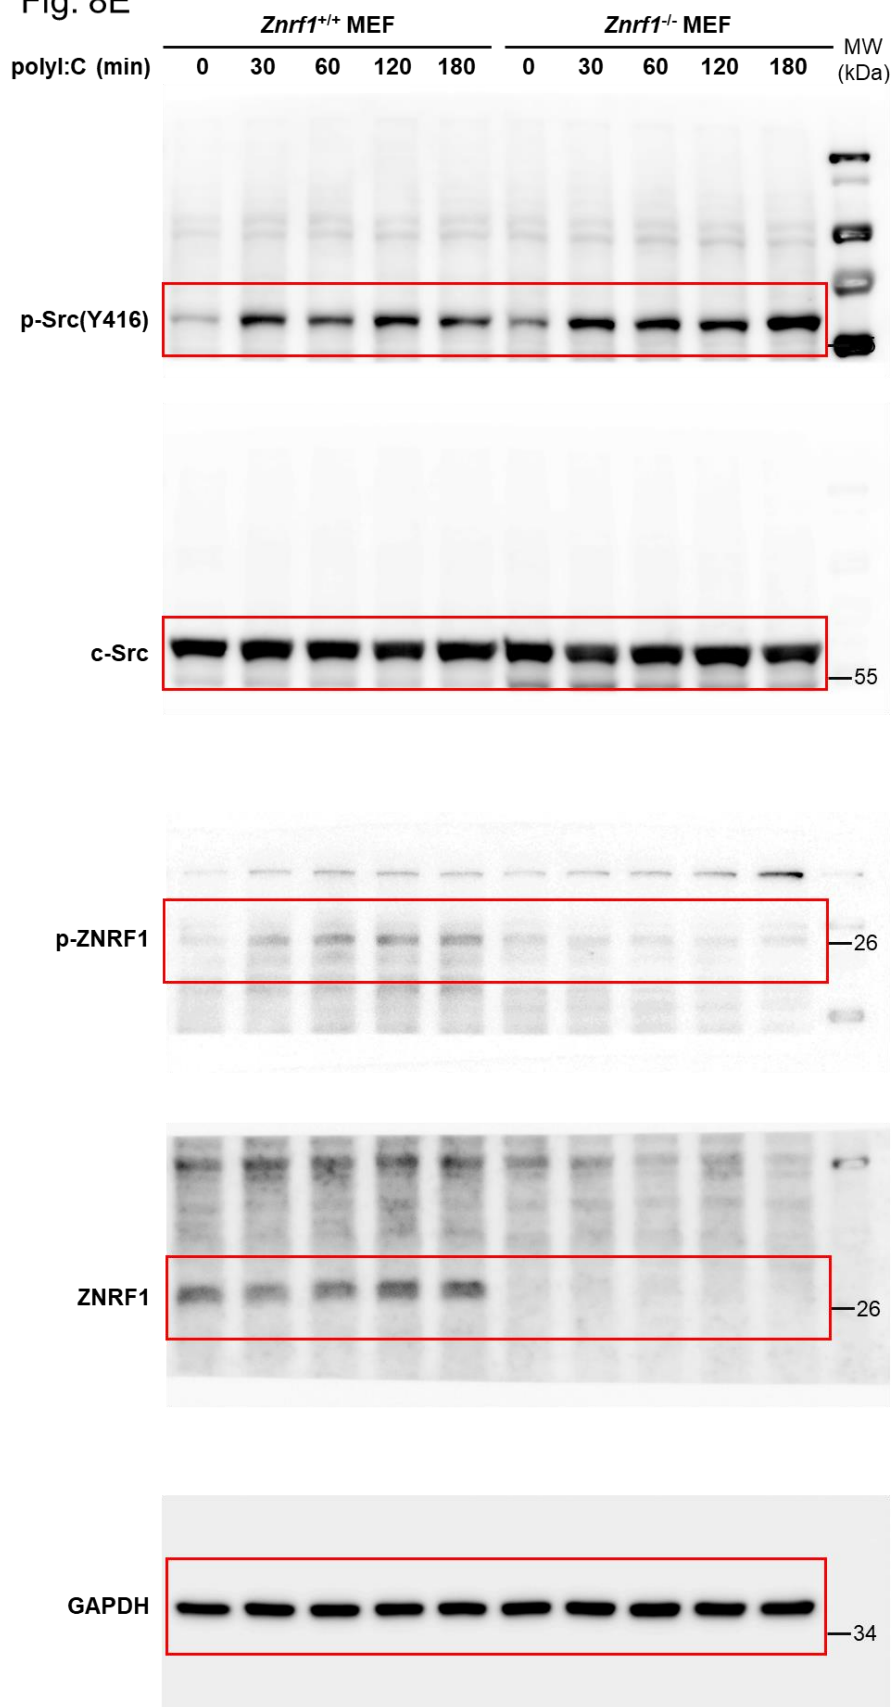

Source Data Figure 8F

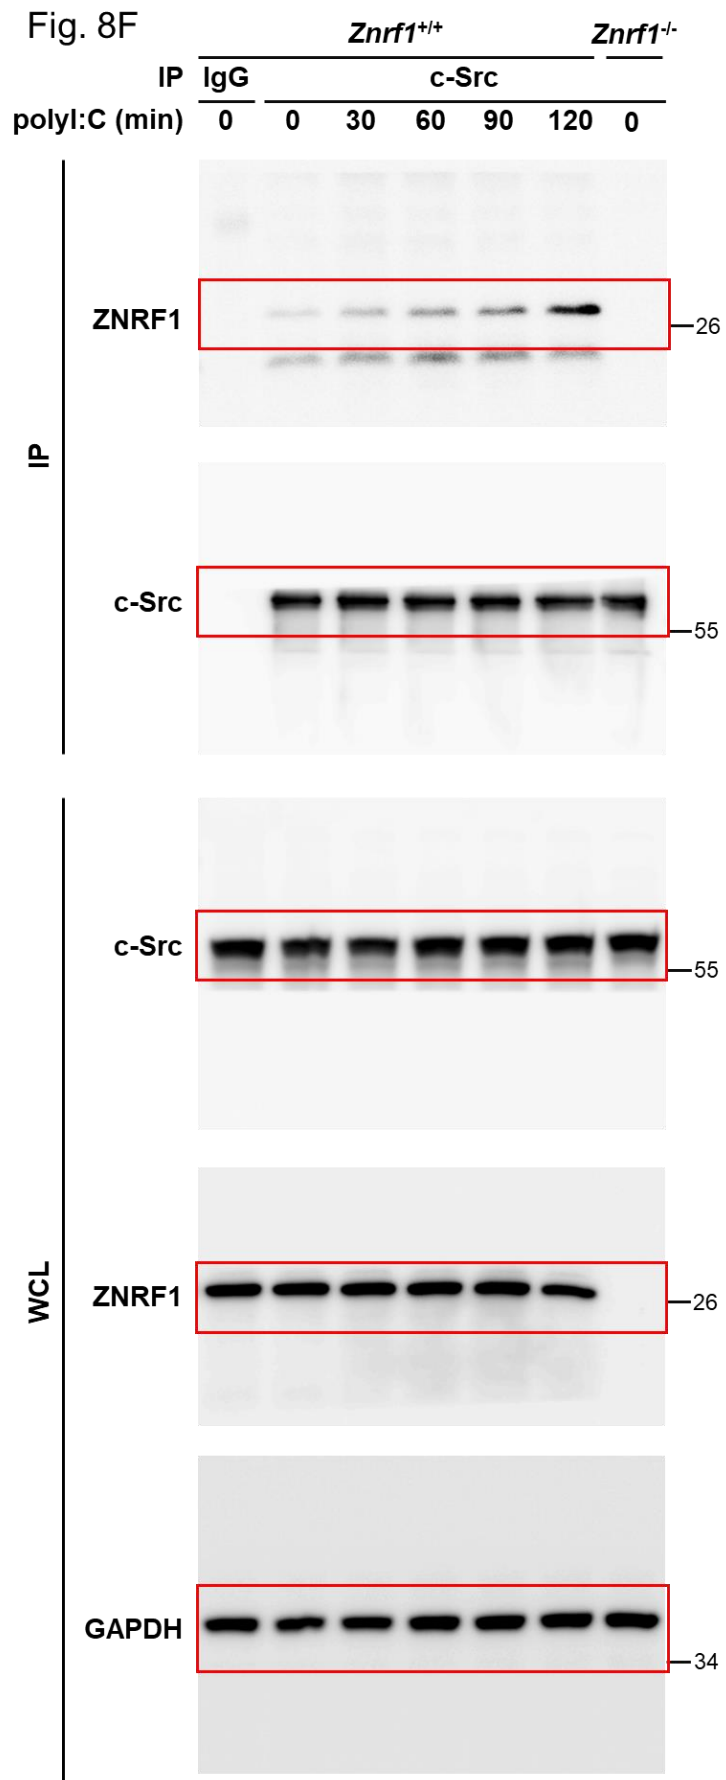

# Source Data Figure 8G

Fig. 8G

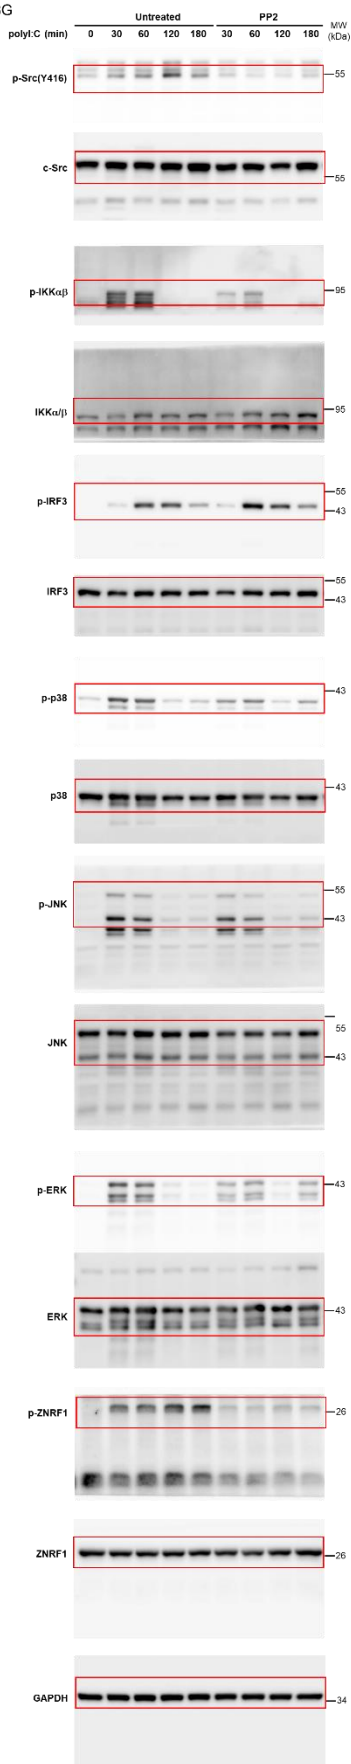

Source Data Figure 8H

Fig. 8H

|                     |   |    |    |    |     |     |   |    |    |    |     |          |
|---------------------|---|----|----|----|-----|-----|---|----|----|----|-----|----------|
| WT-ZNRF1-Flag       | + | +  | +  | +  | +   | +   | - | -  | -  | -  | -   |          |
| ZNRF1(Y103F)-Flag   | - | -  | -  | -  | -   | -   | + | +  | +  | +  | +   |          |
| Myc-c-Src           | - | +  | +  | +  | +   | +   | - | +  | +  | +  | +   |          |
| λPP                 | - | -  | -  | -  | -   | +   | - | -  | -  | -  | -   |          |
| Reaction time (min) | 0 | 15 | 30 | 60 | 120 | 120 | 0 | 15 | 30 | 60 | 120 | MW (kDa) |

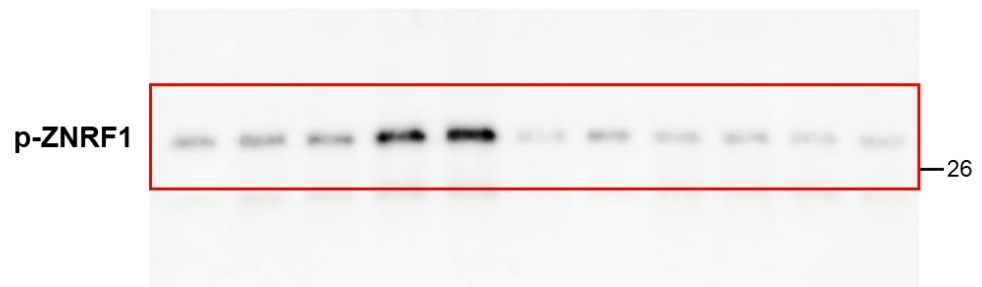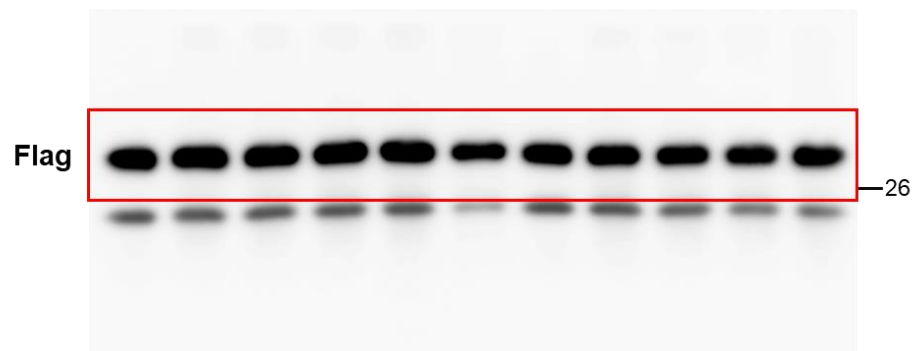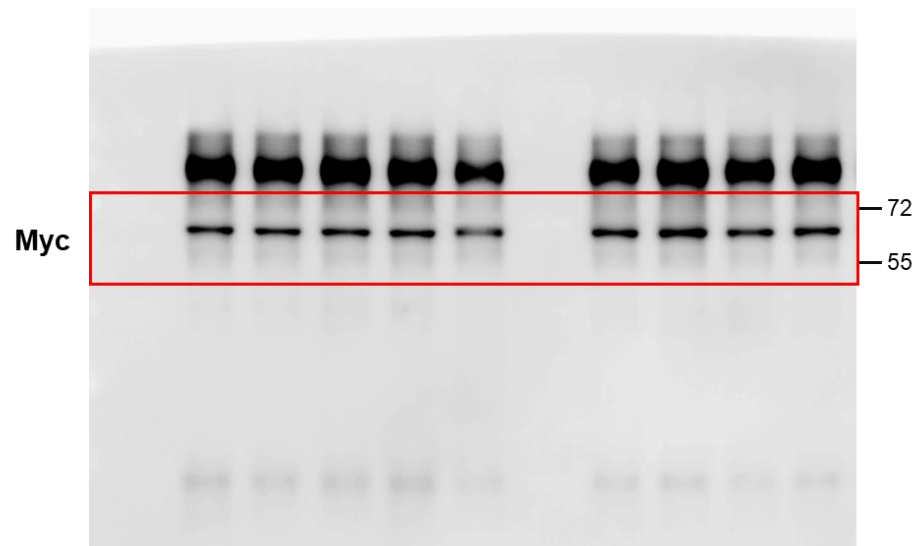

# Source Data Figure 8I

Fig. 8I

|                 |                    |   |   |   |   |   |
|-----------------|--------------------|---|---|---|---|---|
| E3              | WT-ZNRF1-Flag      | + | - | + | + | - |
|                 | ZNRF1 (Y103F)-Flag | - | - | - | - | + |
|                 | Myc-c-Src          | - | - | + | + | + |
|                 | $\lambda$ PP       | - | - | - | + | - |
|                 | TLR3-AcGFP         | - | + | + | + | + |
|                 | E1                 | - | + | + | + | + |
|                 | E2                 | - | + | + | + | + |
| Biotinylated-Ub | -                  | + | + | + | + |   |

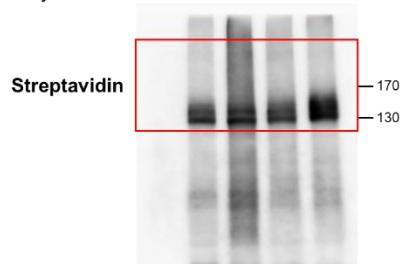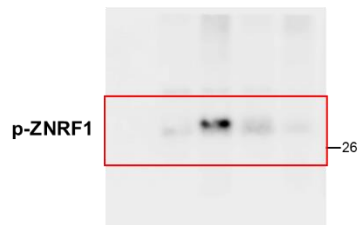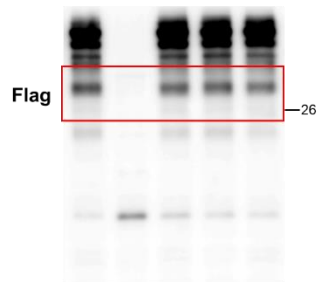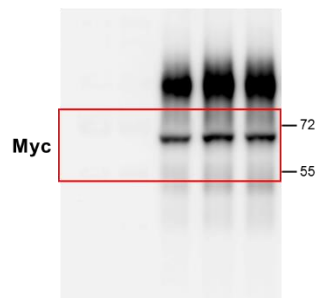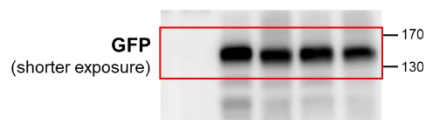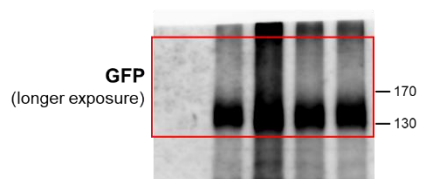

Supplement: JEM_20220727_SourceDataF8.pdf [file JEM_20220727_SourceDataF8.pdf]
