# Supplementary material for: The Src–ZNRF1 axis controls TLR3 trafficking and interferon responses to limit lung barrier damage
Source: PubMed Central journal article supplement (PMC10174191; doi:10.1084/jem.20220727), 2023-05-09

# Source Data Supplementary Figure 4F

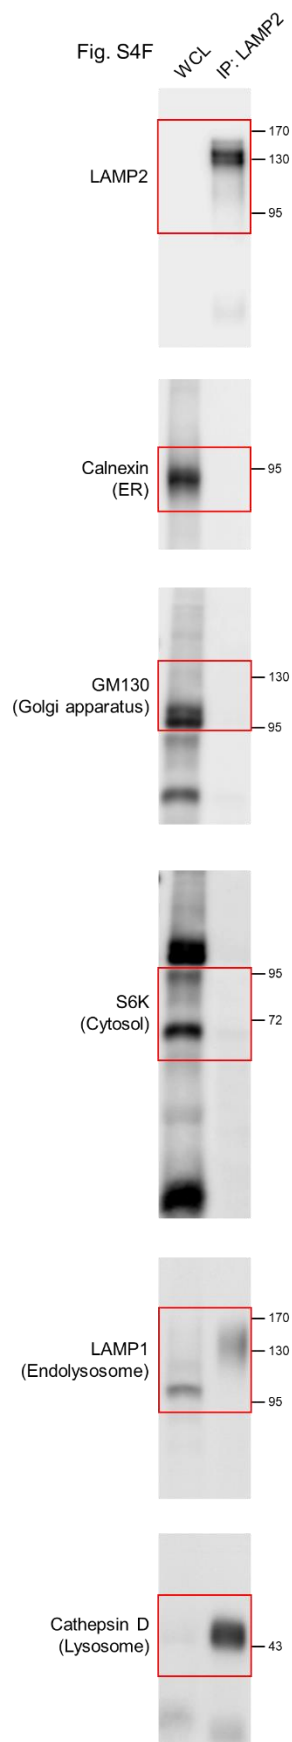

# Source Data Supplementary Figure 4G

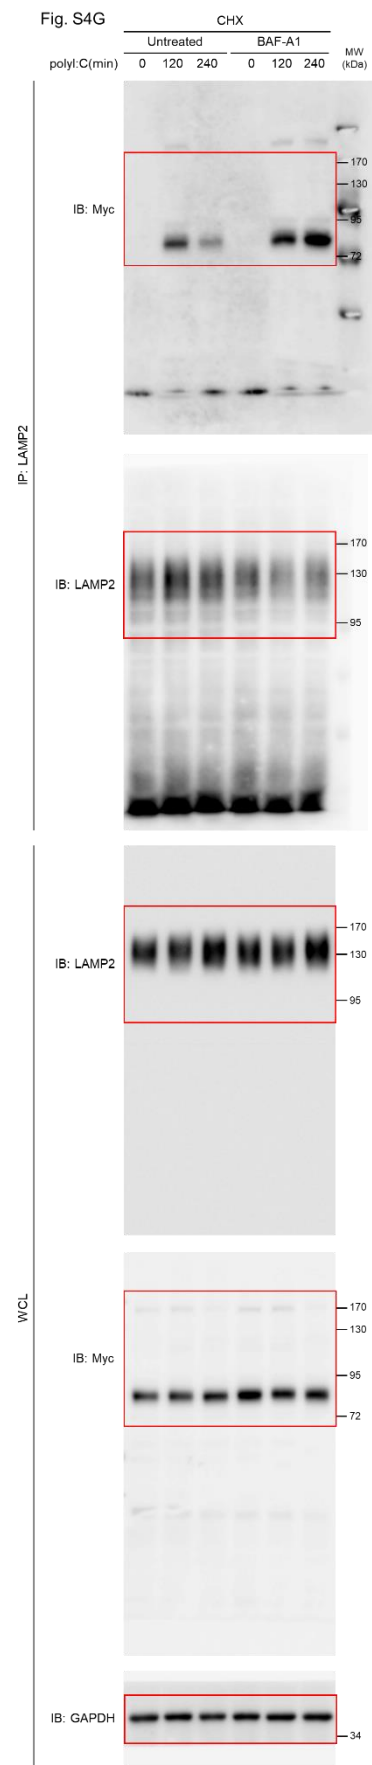

# Source Data Supplementary Figure 4I

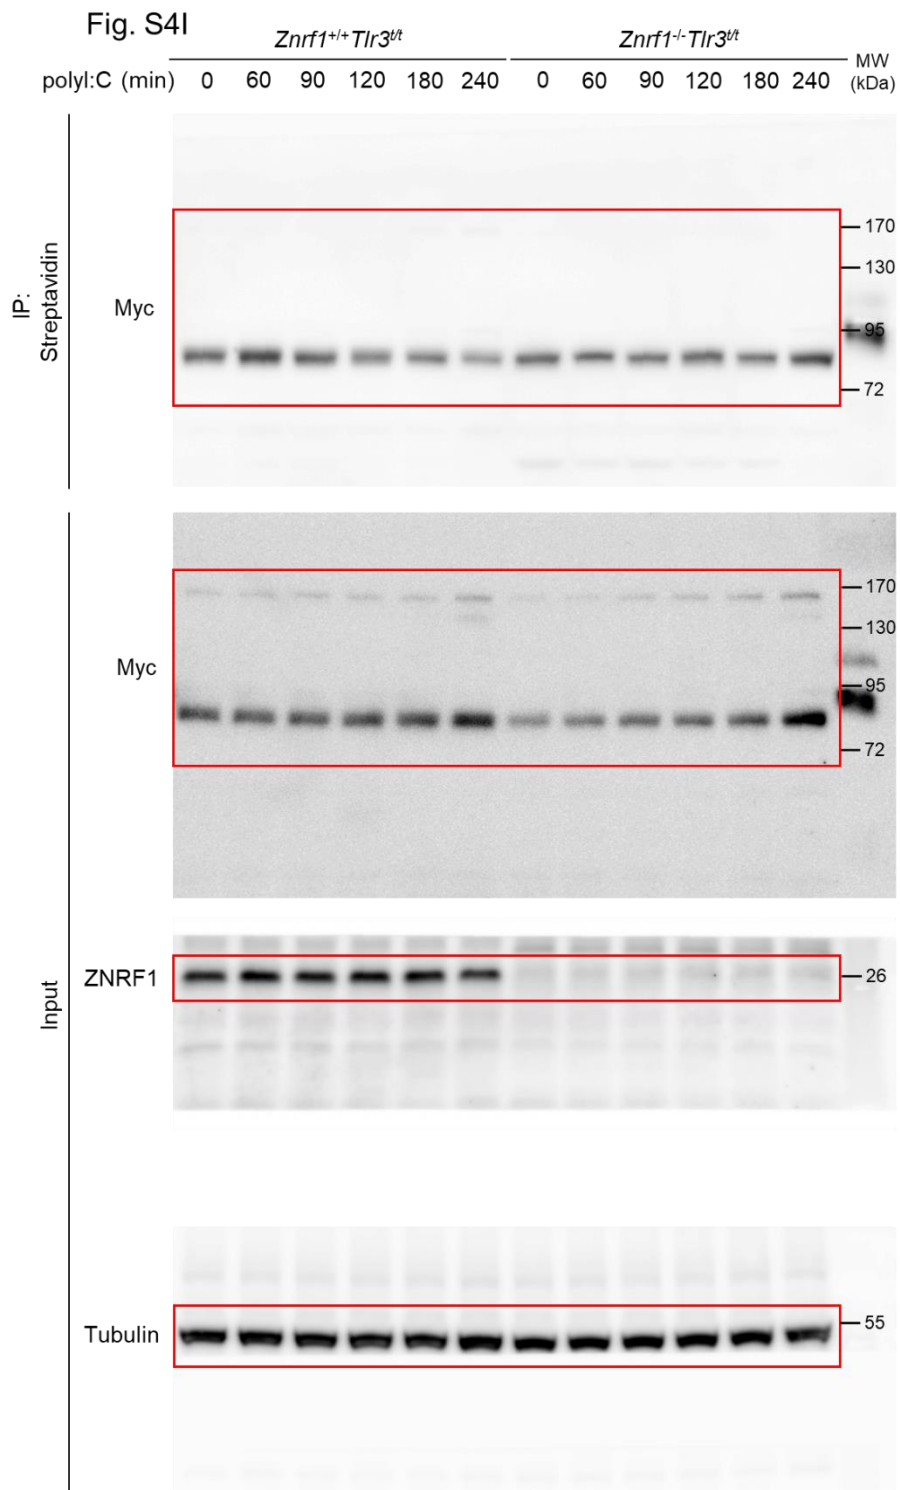

Source Data Supplementary Figure 4J

Fig. S4J

|            |   |   |   |   |   |   |
|------------|---|---|---|---|---|---|
| HRS-Flag   | - | + | - | - | + | + |
| TLR3-AcGFP | - | - | + | - | + | - |
| TLR9-AcGFP | - | - | - | + | - | + |

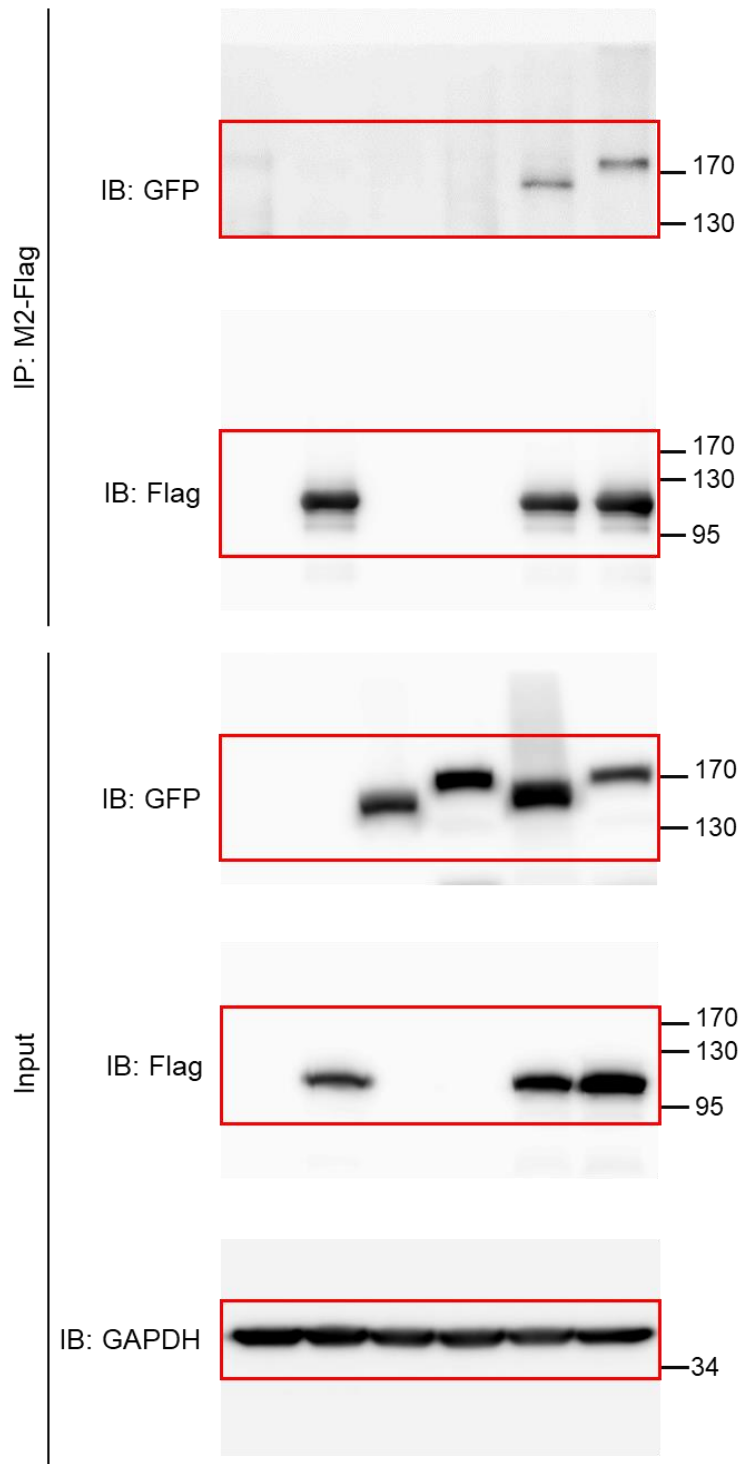

# Source Data Supplementary Figure 4K

Fig. S4K

|           |   |   |   |   |   |   |   |   |   |          |
|-----------|---|---|---|---|---|---|---|---|---|----------|
| Flag-TLR1 | - | - | + | + | - | - | - | - | - | -        |
| Flag-TLR4 | - | - | - | - | + | + | - | - | - | -        |
| Flag-TLR7 | - | - | - | - | - | - | + | + | - | -        |
| Flag-TLR9 | - | - | - | - | - | - | - | - | + | +        |
| ZNRF1-GFP | - | + | - | + | - | + | - | + | - | +        |
|           |   |   |   |   |   |   |   |   |   | MW (kDa) |

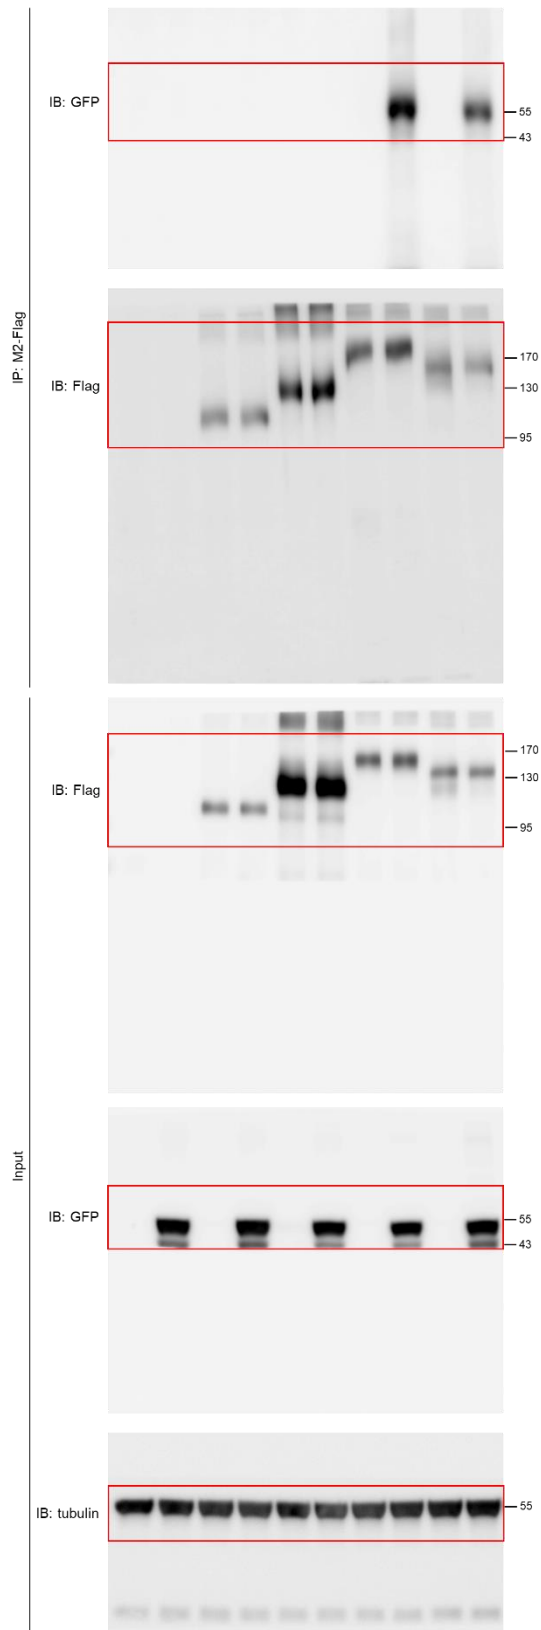

# Source Data Supplementary Figure 4L

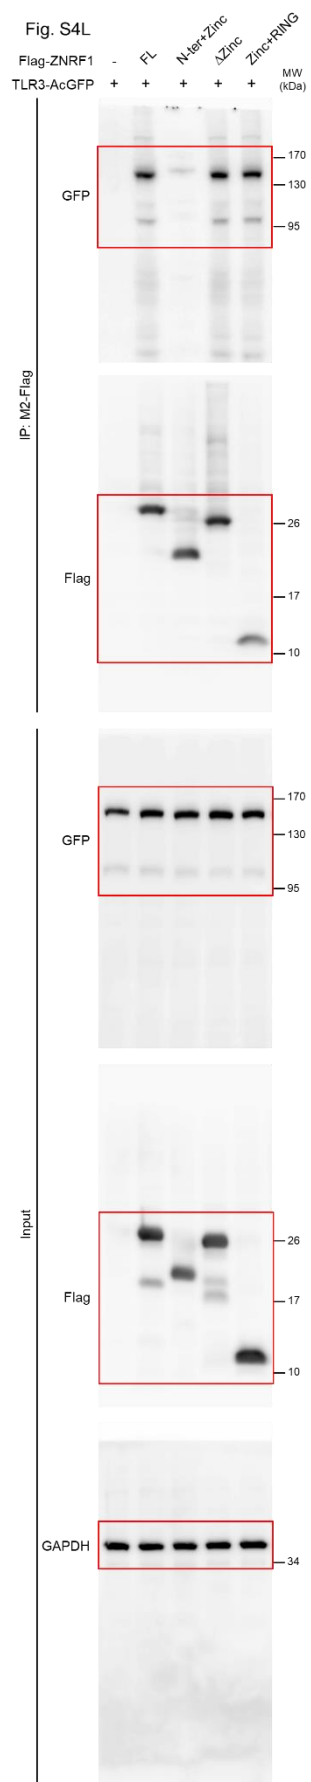

# Source Data Supplementary Figure 4M

Fig S4M

|                 |   |   |   |   |   |   |
|-----------------|---|---|---|---|---|---|
| Flag-TLR2       | - | - | - | + | + | + |
| WT-ZNRF1-myc    | - | + | - | - | + | - |
| ZNRF1 C184A-myc | - | - | + | - | - | + |
| HA-Ub           | + | + | + | + | + | + |

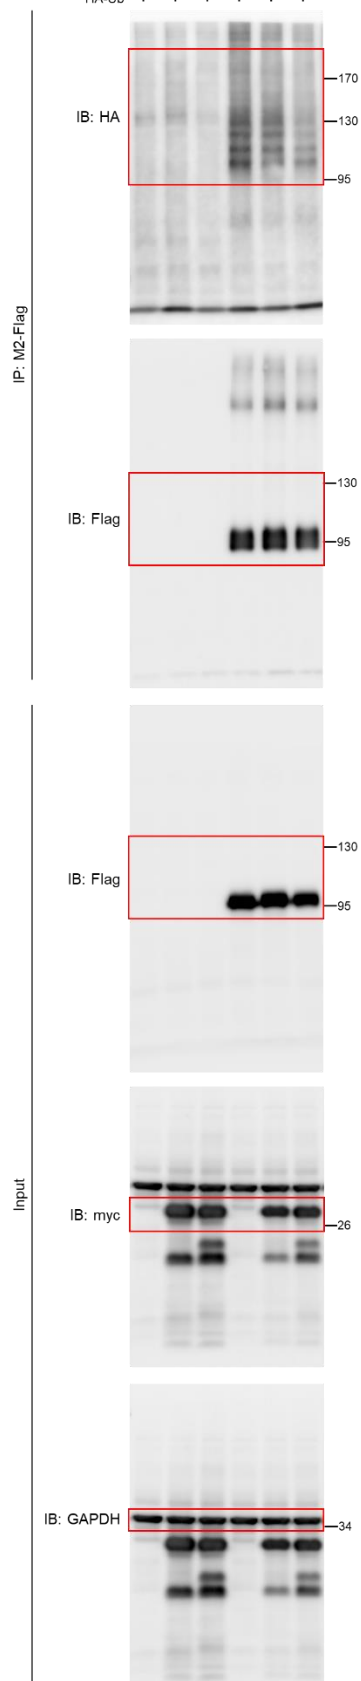

# Source Data Supplementary Figure 4N

Fig. S4N

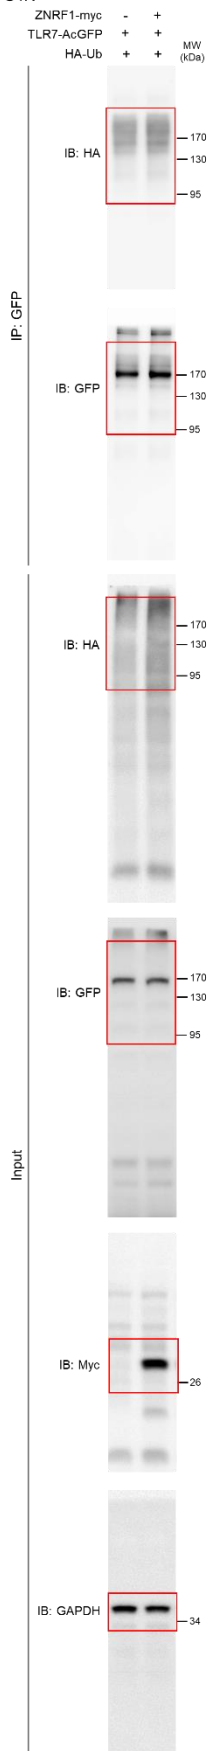



# Source Data Supplementary Figure 40

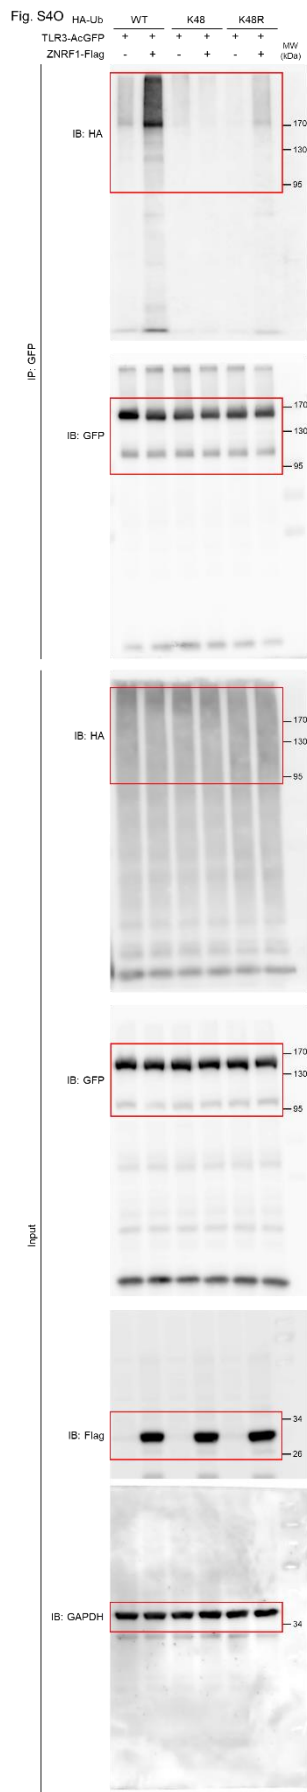

Supplement: JEM_20220727_SourceDataFS4.pdf [file JEM_20220727_SourceDataFS4.pdf]
