# Supplementary material for: The Src–ZNRF1 axis controls TLR3 trafficking and interferon responses to limit lung barrier damage
Source: PubMed Central journal article supplement (PMC10174191; doi:10.1084/jem.20220727), 2023-05-09

# Source Data Figure 1B

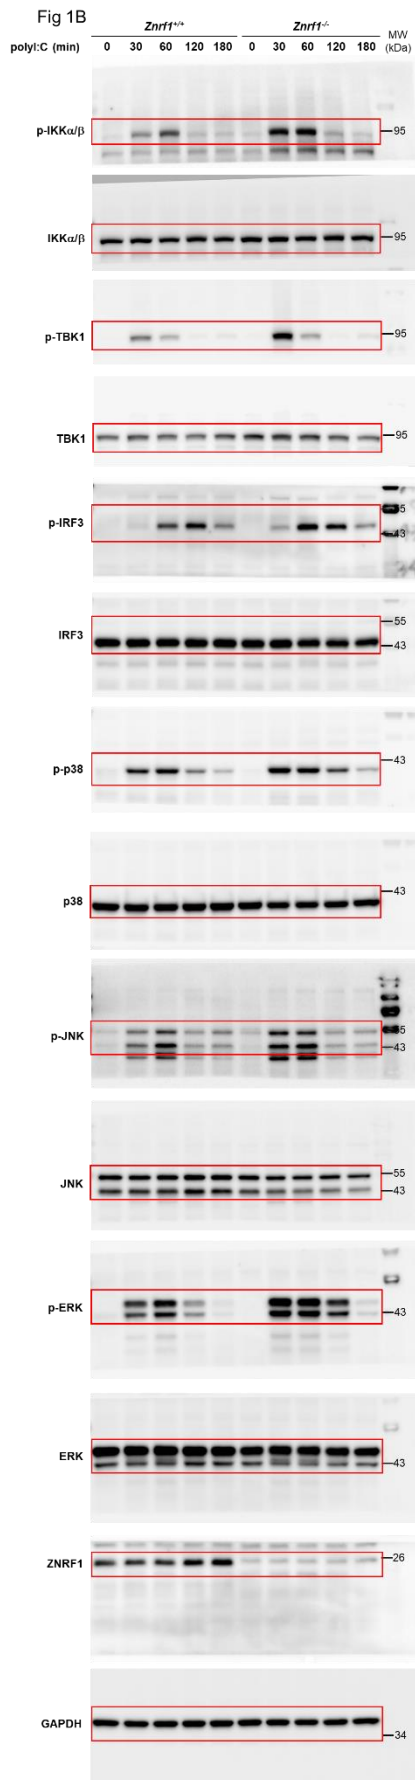

# Source Data Figure 1F

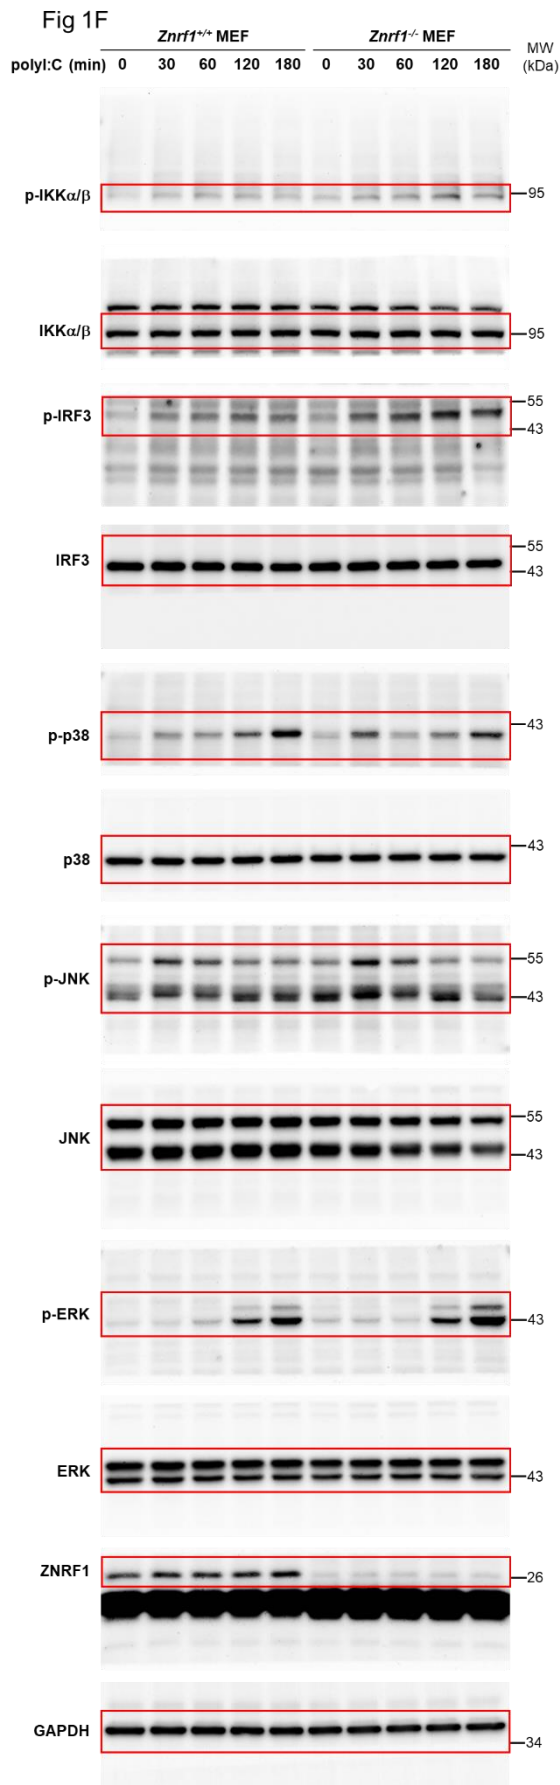

Source Data Figure 1G

Fig. 1G

|             |   |   |   |   |   |   |    |    |
|-------------|---|---|---|---|---|---|----|----|
| polyI:C (h) | 0 | 0 | 4 | 4 | 8 | 8 | 12 | 12 |
| ZNRF1-Flag  | - | + | - | + | - | + | -  | +  |

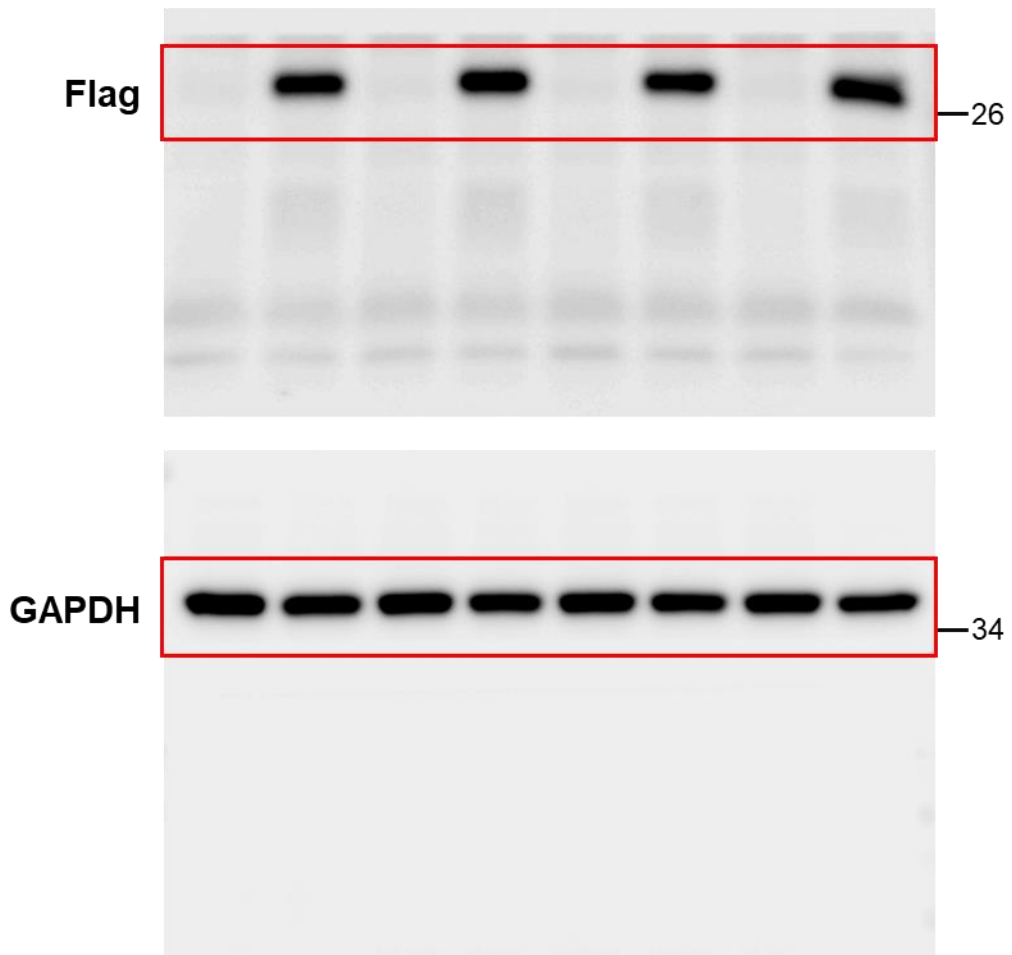

Source Data Figure 1H

Fig. 1H

|             |   |   |   |   |   |   |    |    |
|-------------|---|---|---|---|---|---|----|----|
| polyI:C (h) | 0 | 0 | 4 | 4 | 8 | 8 | 12 | 12 |
| ZNRF1-Flag  | - | + | - | + | - | + | -  | +  |

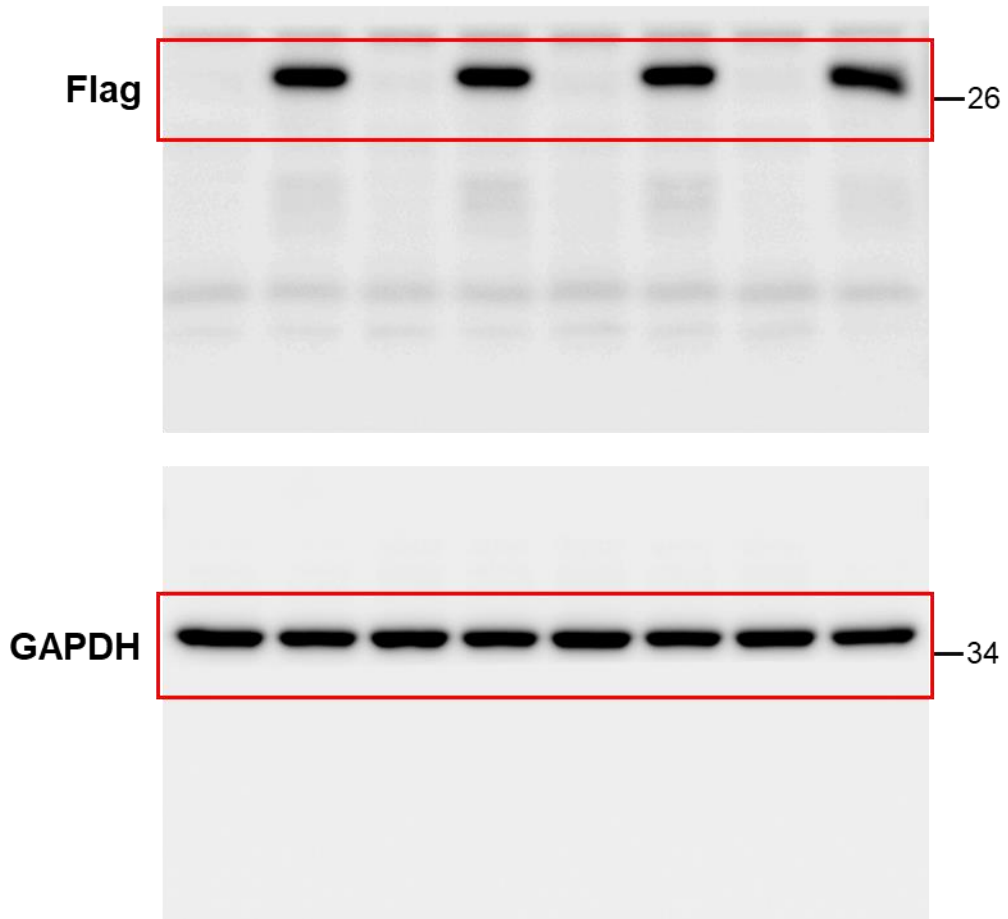

Supplement: JEM_20220727_SourceDataF1.pdf [file JEM_20220727_SourceDataF1.pdf]
