# Supplementary material for: The Src–ZNRF1 axis controls TLR3 trafficking and interferon responses to limit lung barrier damage
Source: PubMed Central journal article supplement (PMC10174191; doi:10.1084/jem.20220727), 2023-05-09

# Source Data Figure 3D

Fig 3D

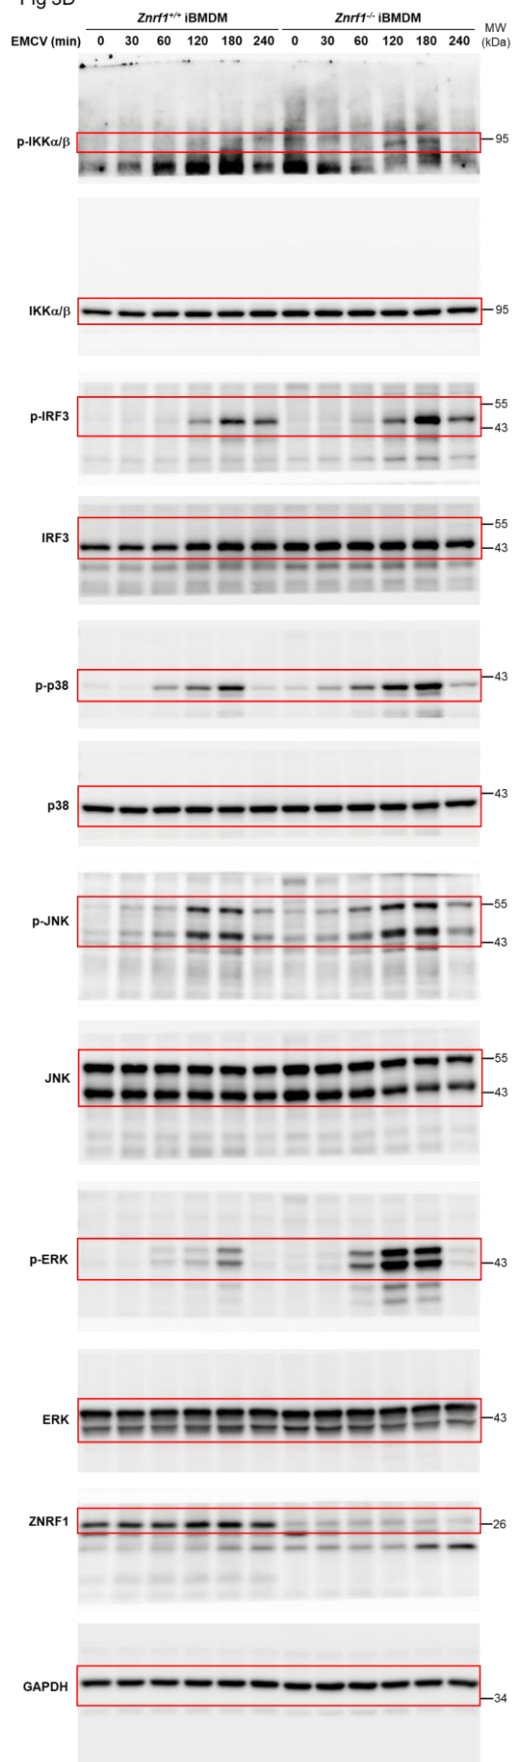

Supplement: JEM_20220727_SourceDataF3.pdf [file JEM_20220727_SourceDataF3.pdf]
