# Supplementary material for: The Src–ZNRF1 axis controls TLR3 trafficking and interferon responses to limit lung barrier damage
Source: PubMed Central journal article supplement (PMC10174191; doi:10.1084/jem.20220727), 2023-05-09

# Source Data Figure 7A

**Fig. 7A**

|           |   |   |   |   |   |   |
|-----------|---|---|---|---|---|---|
| Flag-TLR2 | - | - | + | + | - | - |
| Flag-TLR3 | - | - | - | - | + | + |
| ZNRF1-myc | - | + | - | + | - | + |

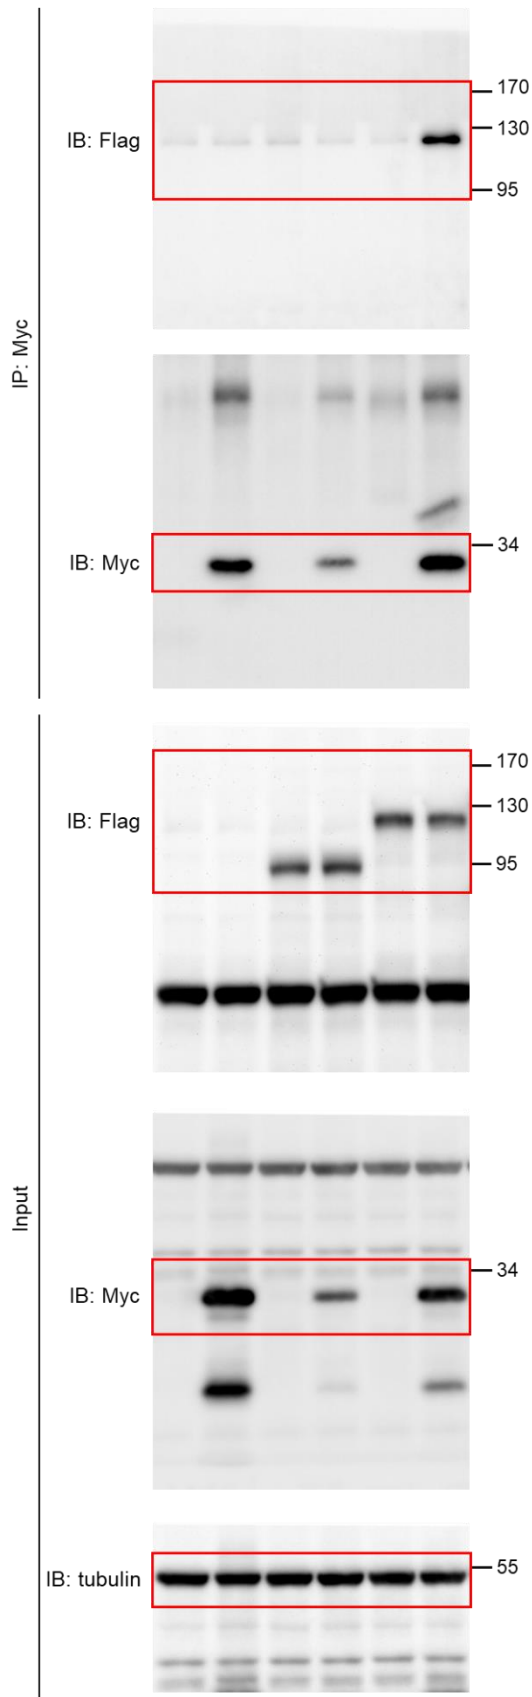

# Source Data Figure 7B

Fig. 7B

|           |   |   |   |   |   |   |
|-----------|---|---|---|---|---|---|
| Flag-TLR2 | - | - | + | + | - | - |
| Flag-TLR3 | - | - | - | - | + | + |
| ZNRF1-GFP | - | + | - | + | - | + |

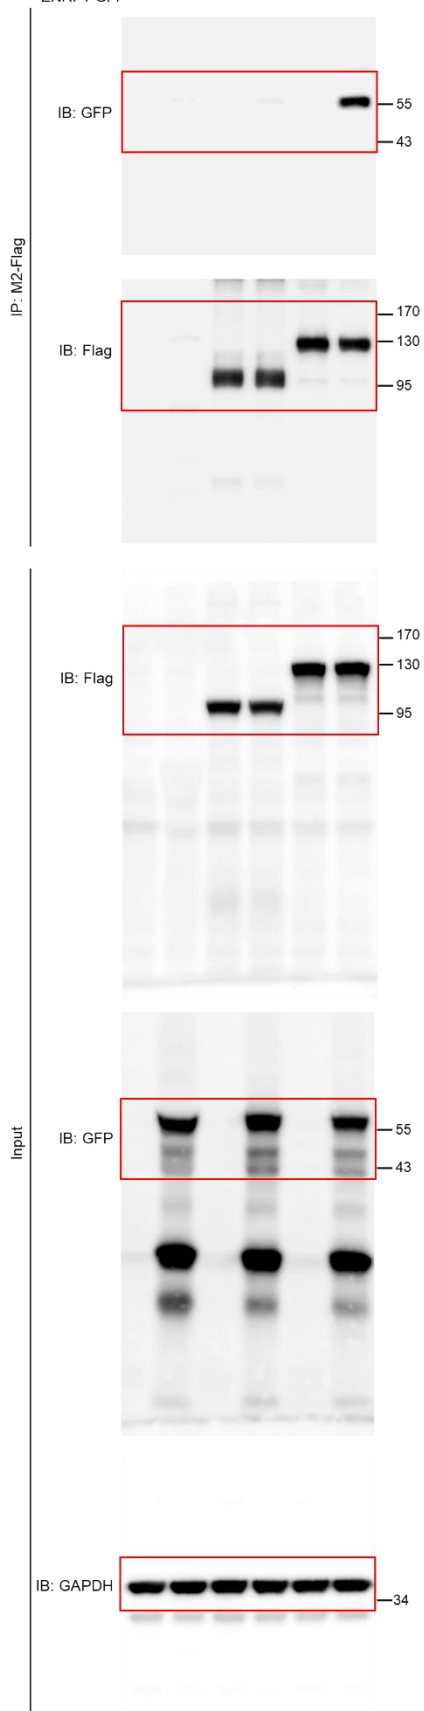

# Source Data Figure 7C

Fig. 7C

|             |   |   |   |   |   |   |
|-------------|---|---|---|---|---|---|
| TLR3-AcGFP  | + | + | + | - | - | - |
| AcGFP       | - | - | - | + | + | + |
| WT-ZNRF1    | - | + | - | - | + | - |
| ZNRF1 C184A | - | - | + | - | - | + |
| HA-Ub       | + | + | + | + | + | + |

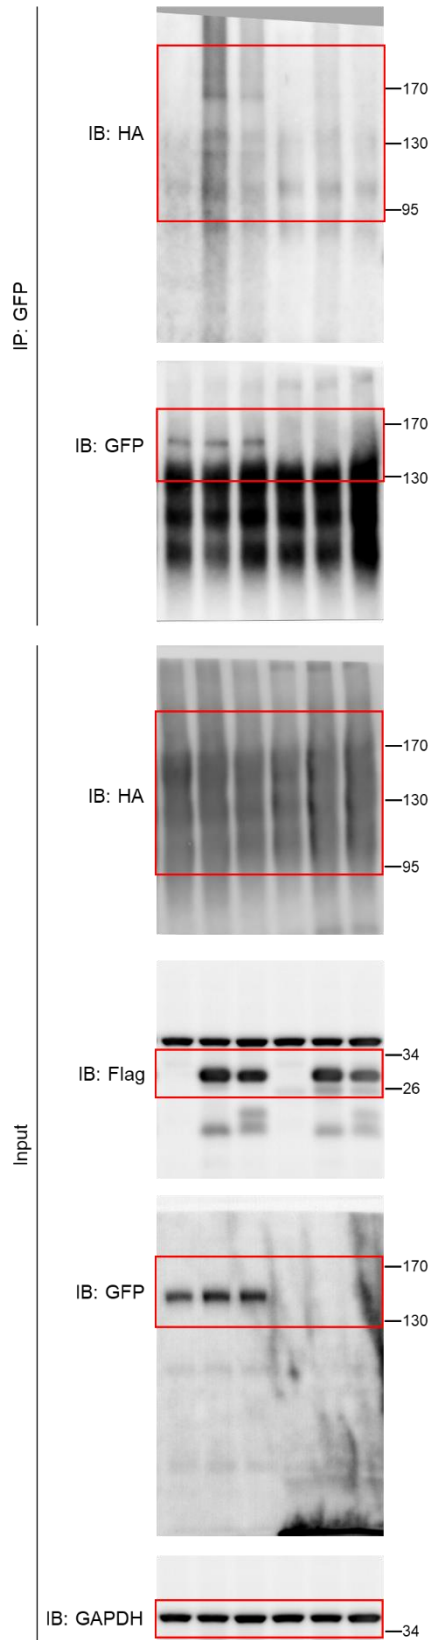

# Source Data Figure 7D

Fig. 7D

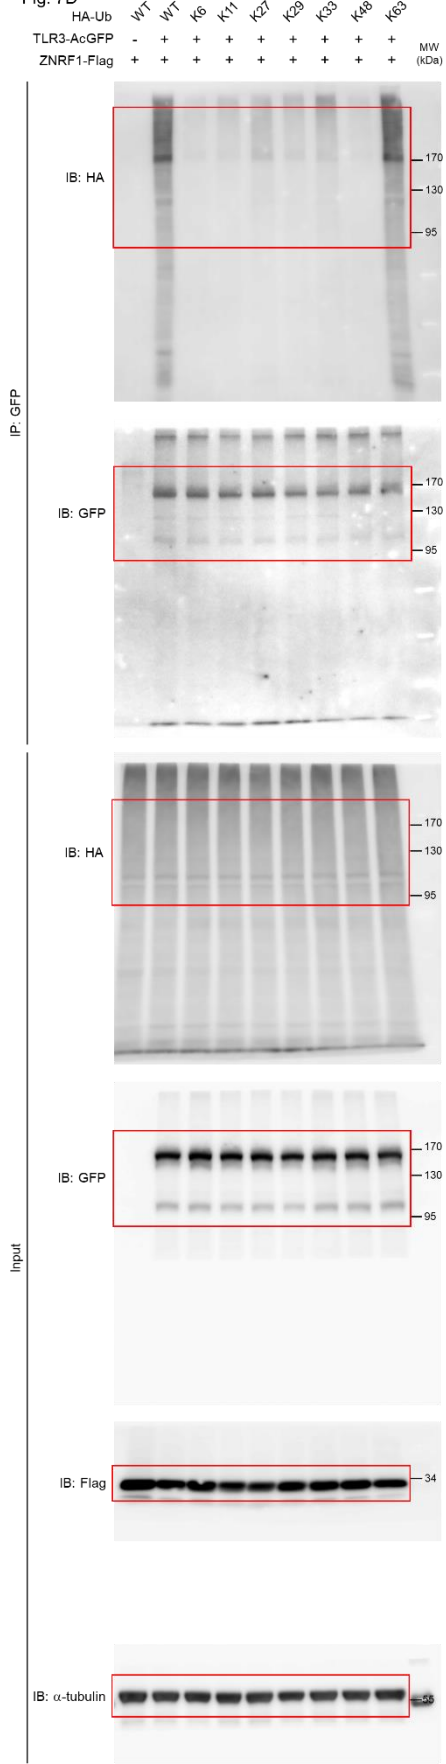

# Source Data Figure 7E

Fig. 7E

| HA-Ub      | WT |   | K63 |   | K63R |   | MW (kDa) |
|------------|----|---|-----|---|------|---|----------|
| TLR3-AcGFP | +  | + | +   | + | +    | + |          |
| ZNRF1-Flag | -  | + | -   | + | -    | + |          |

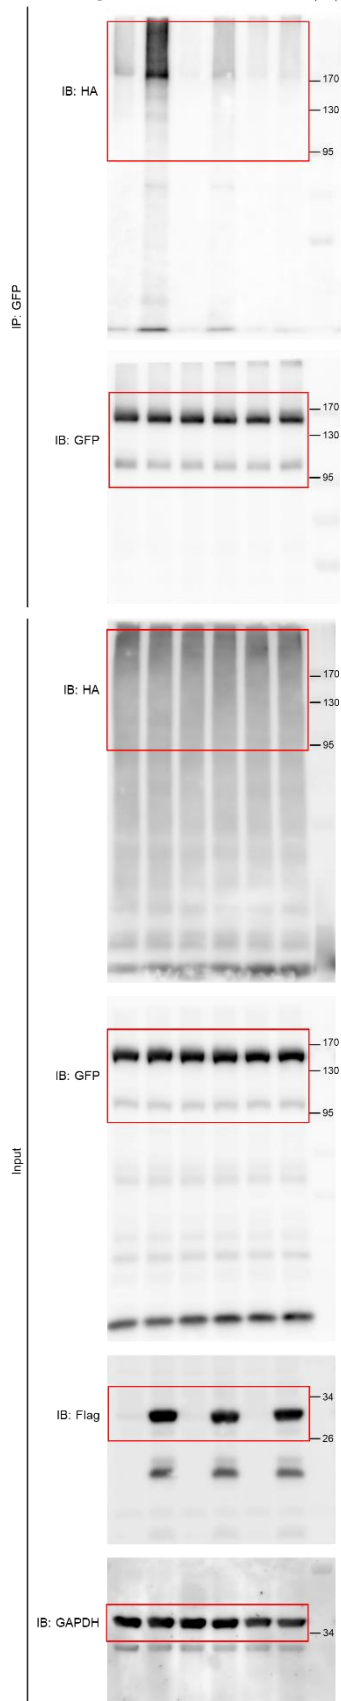

# Source Data Figure 7F

Fig. 7F

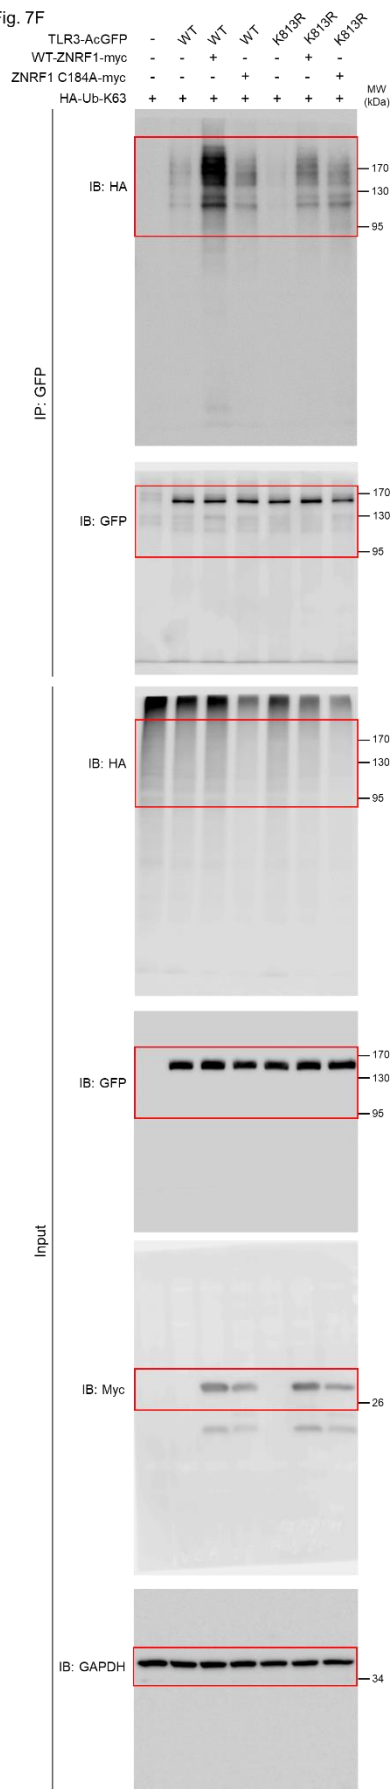

# Source Data Figure 7G

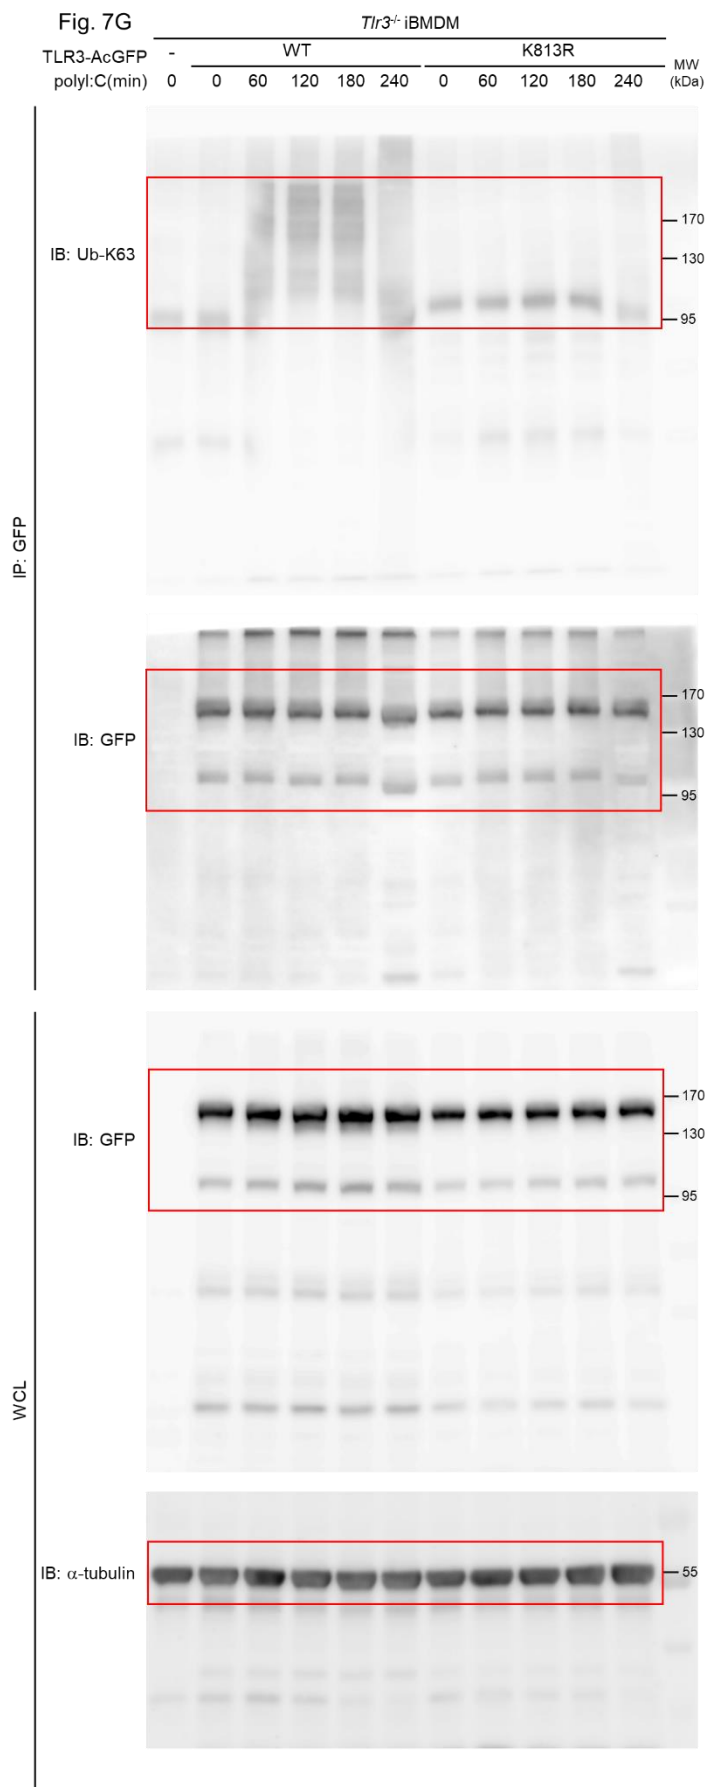

Supplement: JEM_20220727_SourceDataF7.pdf [file JEM_20220727_SourceDataF7.pdf]
