# Supplementary material for: The Src–ZNRF1 axis controls TLR3 trafficking and interferon responses to limit lung barrier damage
Source: PubMed Central journal article supplement (PMC10174191; doi:10.1084/jem.20220727), 2023-05-09

# Source Data Supplementary Figure 1A

Fig. S1A

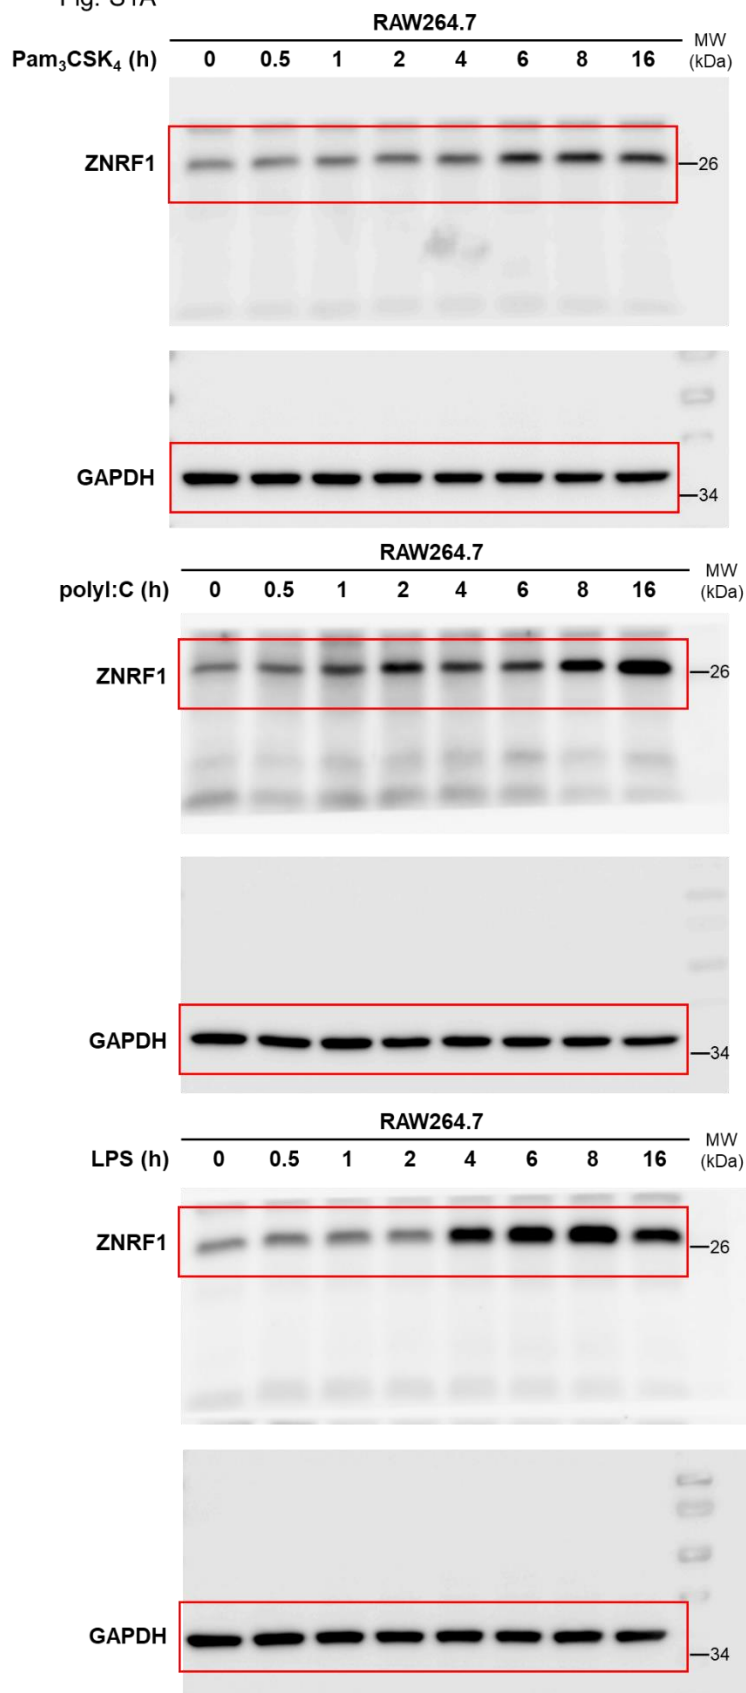



# Source Data Supplementary Figure 1E

**Fig. S1E**

|               | <i>Znrf1<sup>+/+</sup></i> |    |    |     |     | <i>Znrf1<sup>-/-</sup></i> |    |    |     |     |       |
|---------------|----------------------------|----|----|-----|-----|----------------------------|----|----|-----|-----|-------|
| PolyI:C (min) | 0                          | 30 | 60 | 120 | 120 | 0                          | 30 | 60 | 120 | 120 | MW    |
| DTT           | -                          | -  | -  | -   | +   | -                          | -  | -  | -   | +   | (kDa) |

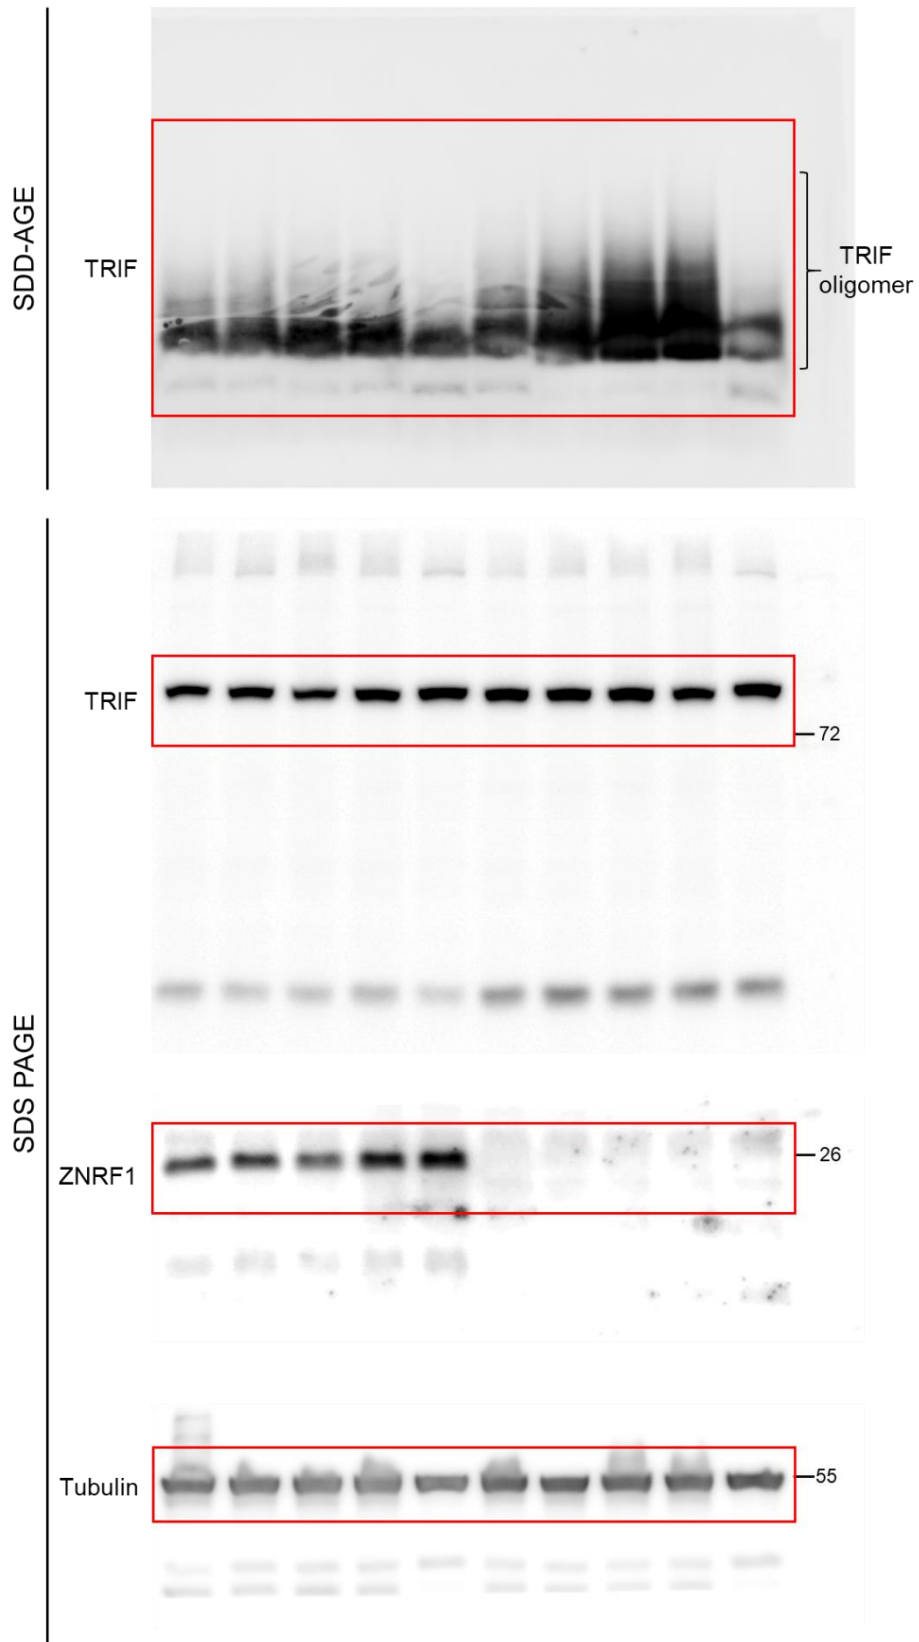

# Source Data Supplementary Figure 1F

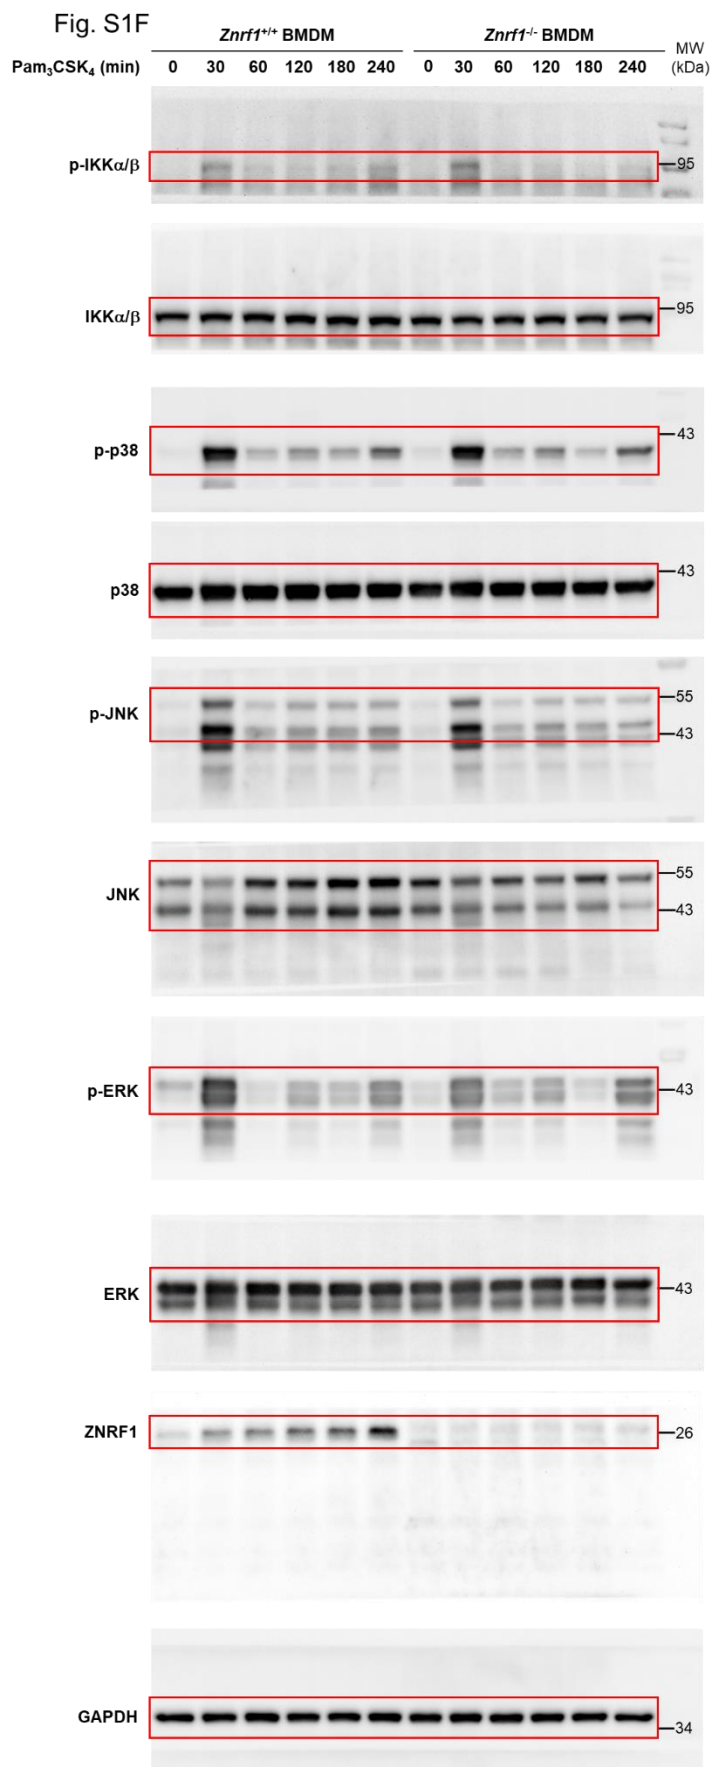

Supplement: JEM_20220727_SourceDataFS1.pdf [file JEM_20220727_SourceDataFS1.pdf]
