# Supplementary material for: The Src–ZNRF1 axis controls TLR3 trafficking and interferon responses to limit lung barrier damage
Source: PubMed Central journal article supplement (PMC10174191; doi:10.1084/jem.20220727), 2023-05-09

# Source Data Supplementary Figure 2A

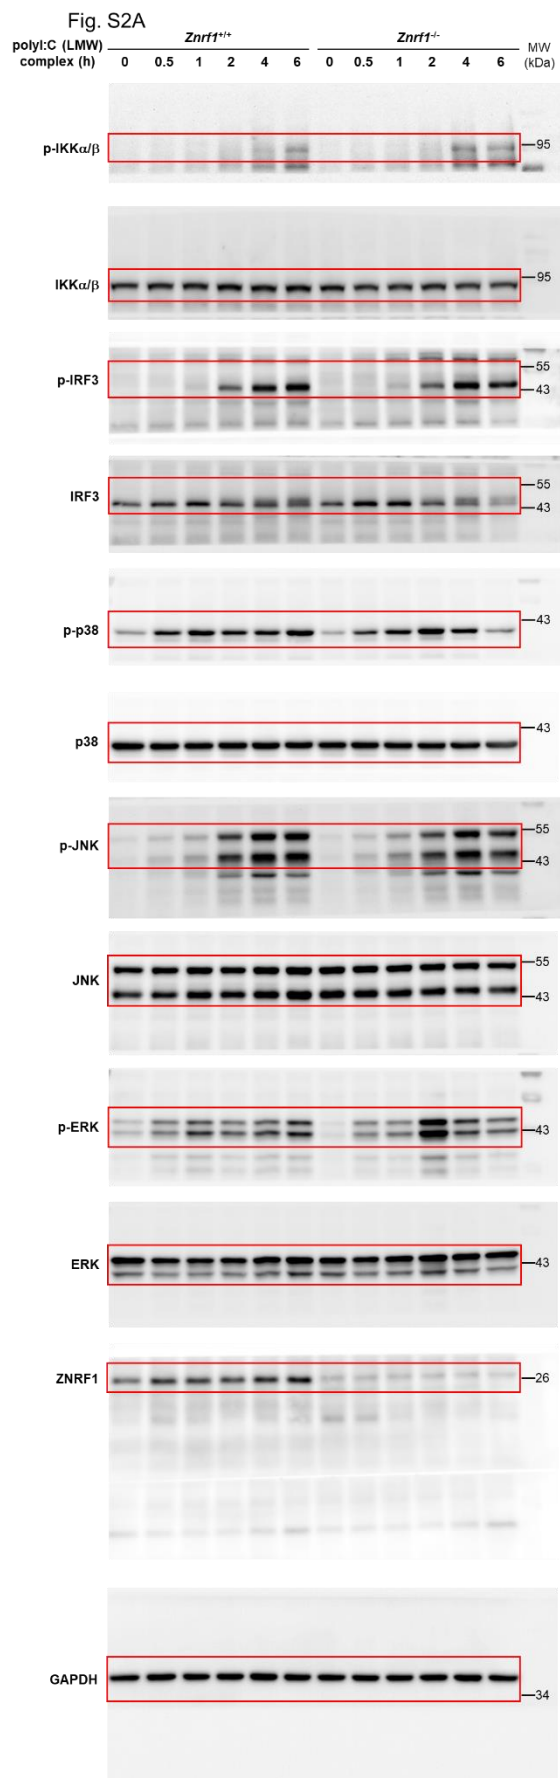

# Source Data Supplementary Figure 2B

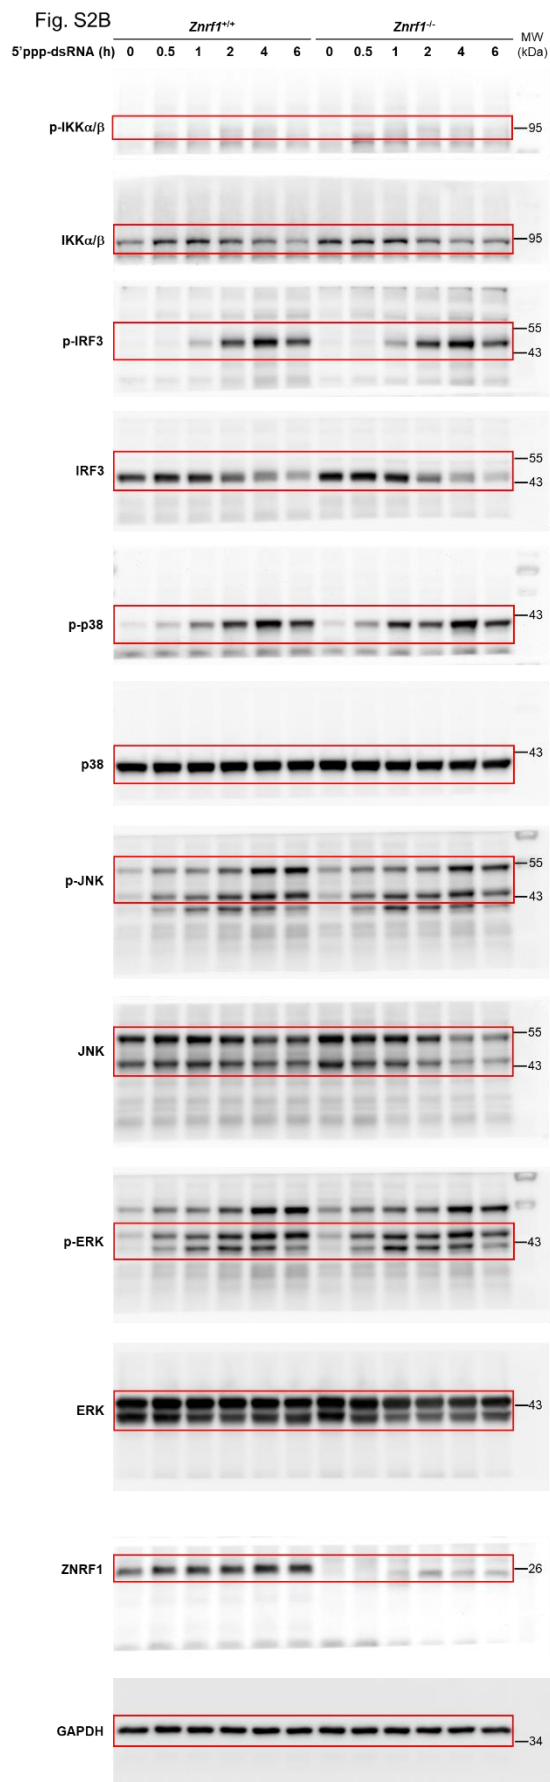

# Source Data Supplementary Figure 2C

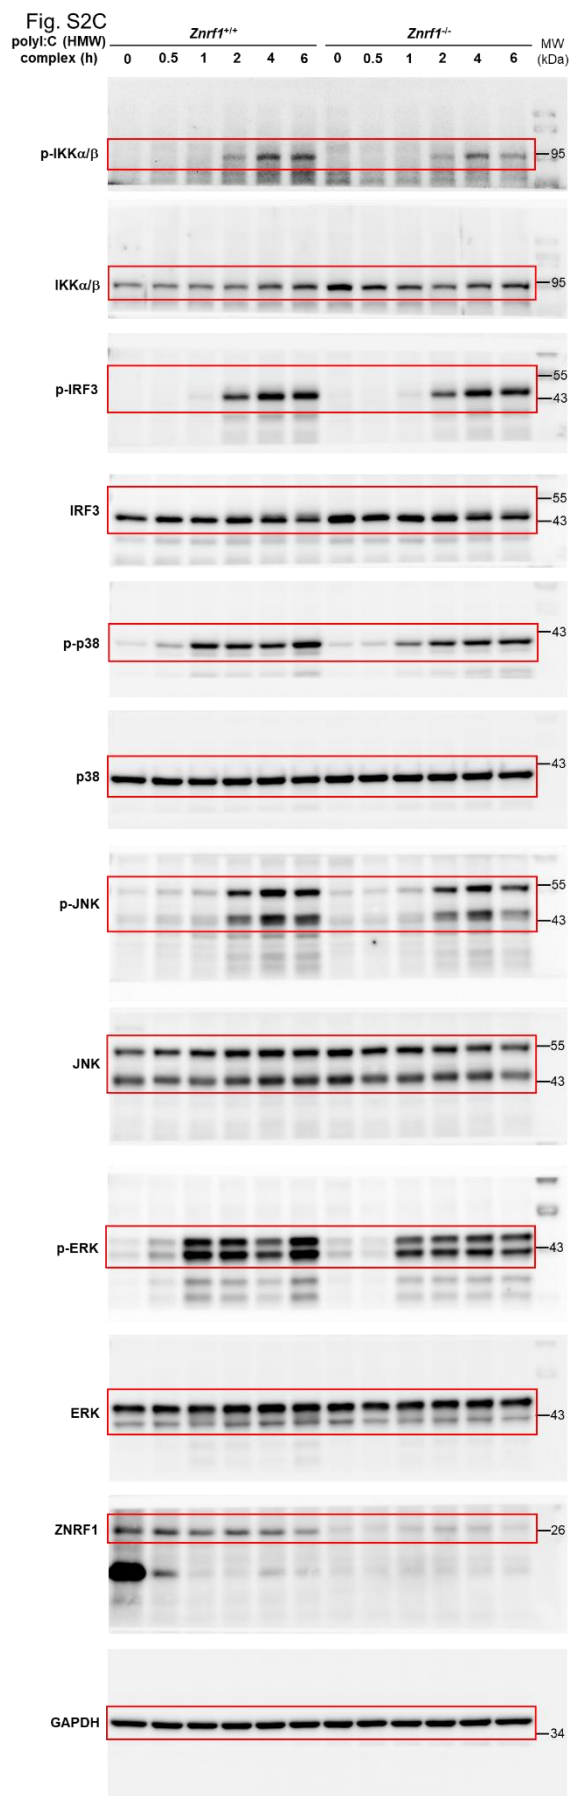

## Source Data Supplementary Figure 2D

Fig. S2D

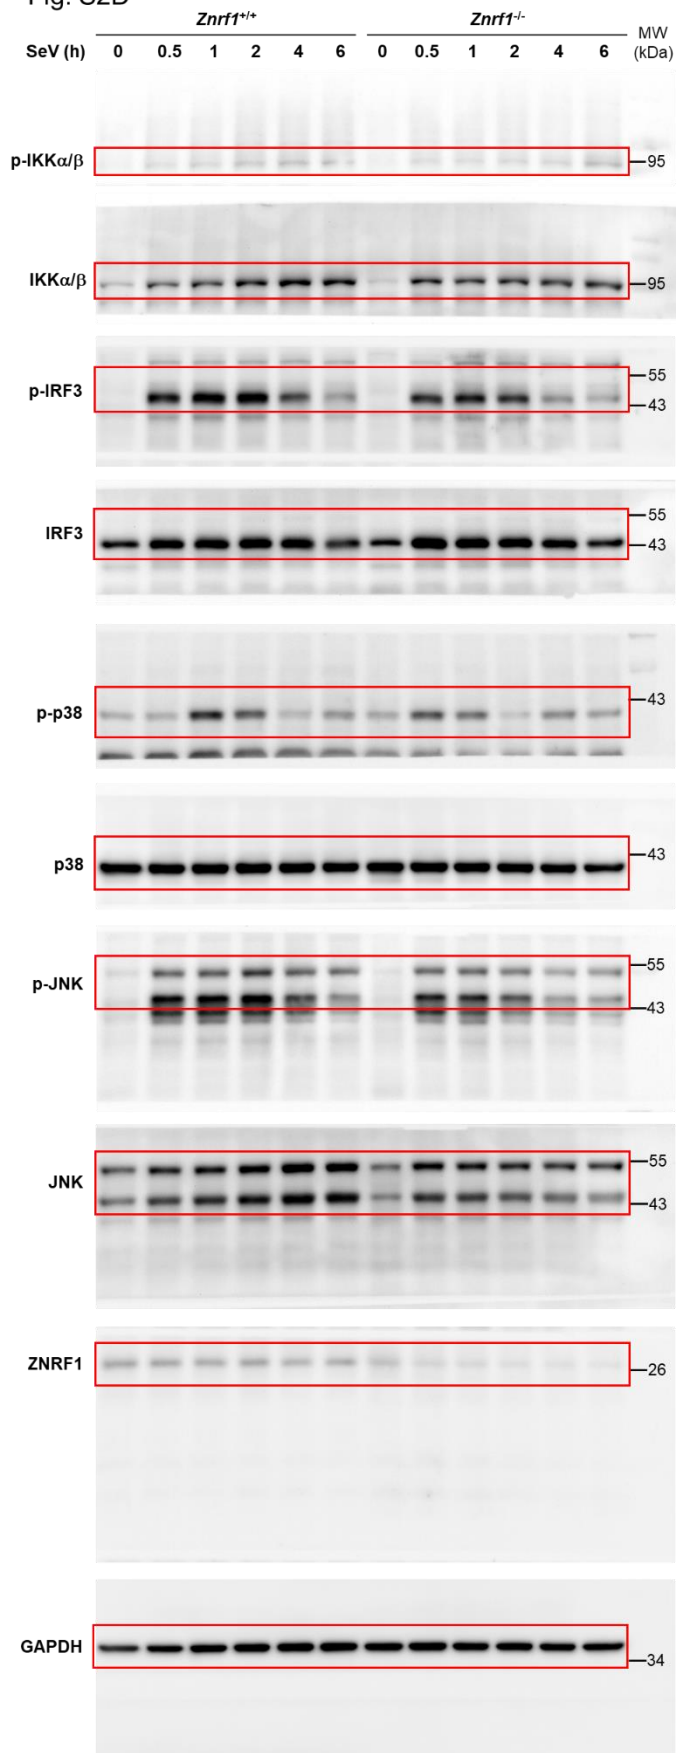

# Source Data Supplementary Figure 2I

## Fig. S2I

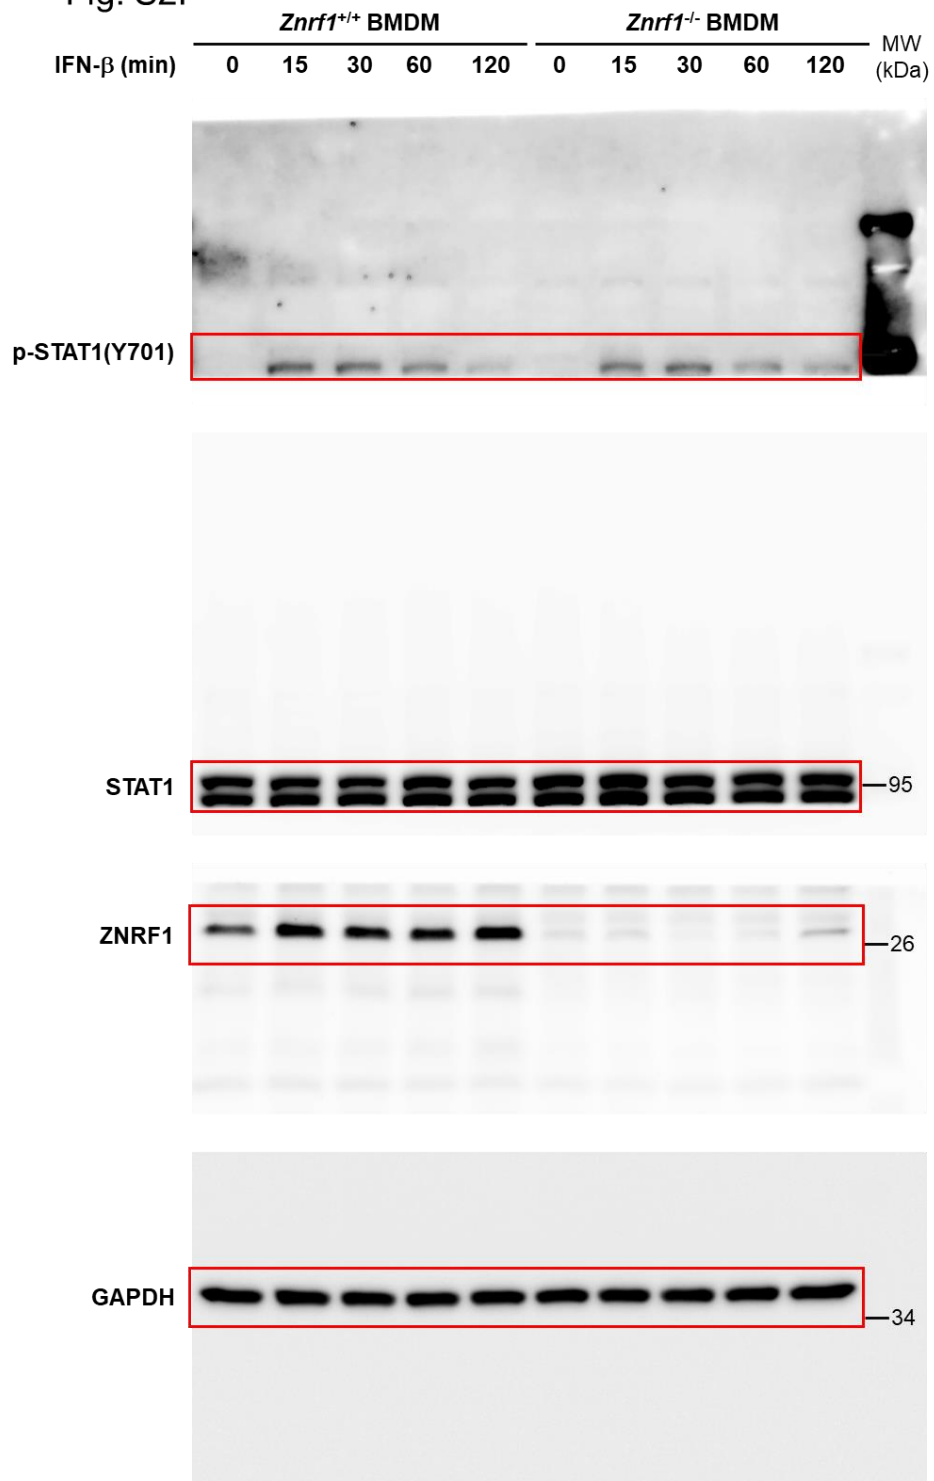

Supplement: JEM_20220727_SourceDataFS2.pdf [file JEM_20220727_SourceDataFS2.pdf]
