# Supplementary material for: The Src–ZNRF1 axis controls TLR3 trafficking and interferon responses to limit lung barrier damage
Source: PubMed Central journal article supplement (PMC10174191; doi:10.1084/jem.20220727), 2023-05-09

# Source Data Supplementary Figure 3B

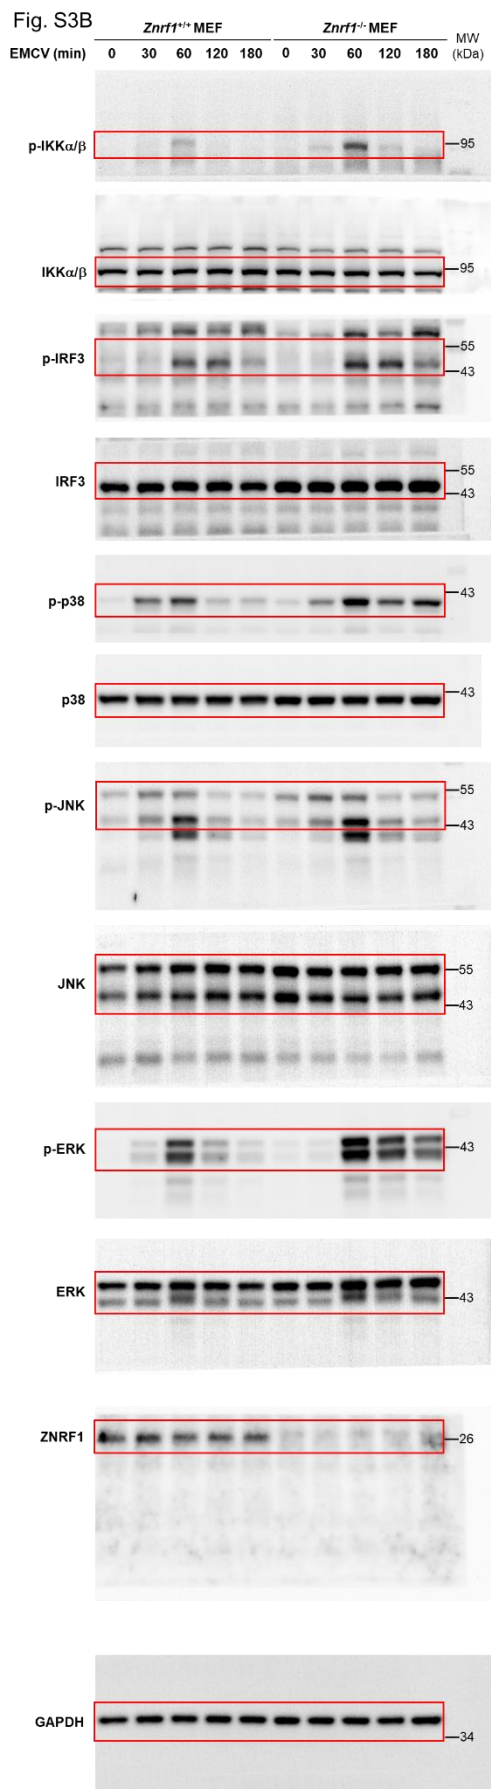

Source Data Supplementary Figure 3H

Fig. S3H

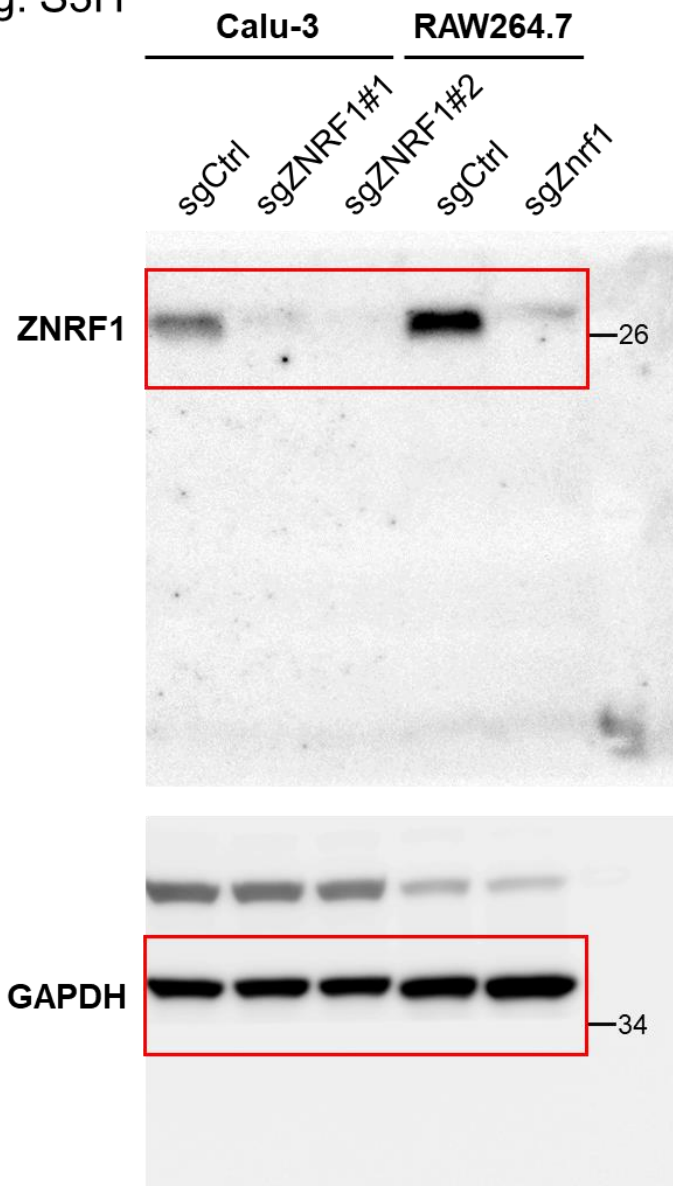

Source Data Supplementary Figure 3K

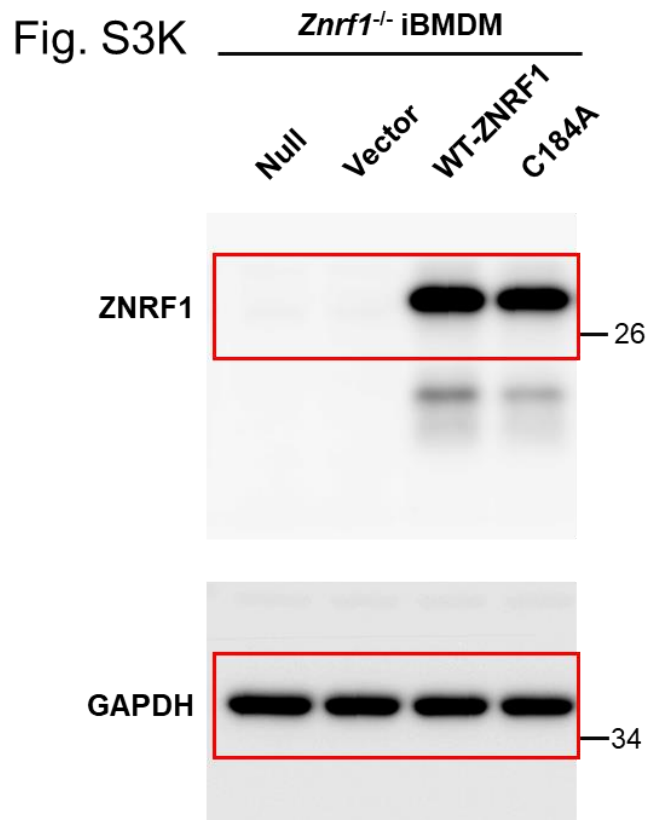

# Source Data Supplementary Figure 3M

Fig. S3M

|                  | Vector |   | Flag-RIG-I |   |   | Flag-MDA5 |   |   | Flag-TLR3 |   |   |
|------------------|--------|---|------------|---|---|-----------|---|---|-----------|---|---|
| WT-ZNRF1-Myc     | -      | + | -          | - | + | -         | + | - | -         | + | - |
| ZNRF1(C184A)-Myc | -      | - | +          | - | - | +         | - | + | -         | - | + |

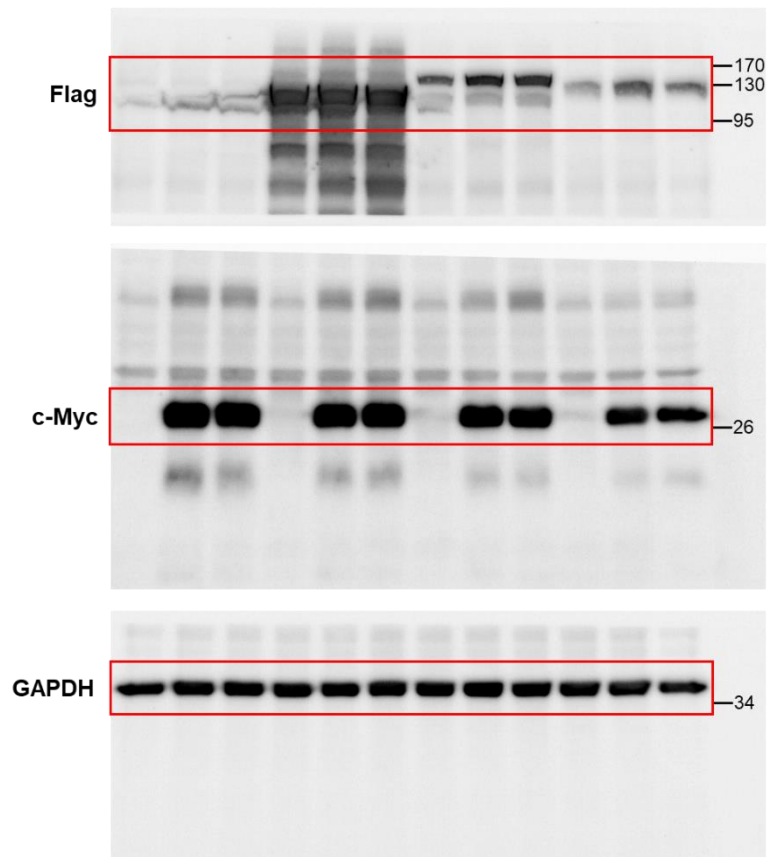

# Source Data Supplementary Figure 3N

Fig. S3N

|                  | Flag-RIG-I |   |   | Flag-MDA5 |   |   | Flag-TLR2 |   |   | Flag-TLR3 |   |   |
|------------------|------------|---|---|-----------|---|---|-----------|---|---|-----------|---|---|
| WT-ZNRF1-Myc     | -          | + | - | -         | + | - | -         | + | - | -         | + | - |
| ZNRF1(C184A)-Myc | -          | - | + | -         | - | + | -         | - | + | -         | - | + |

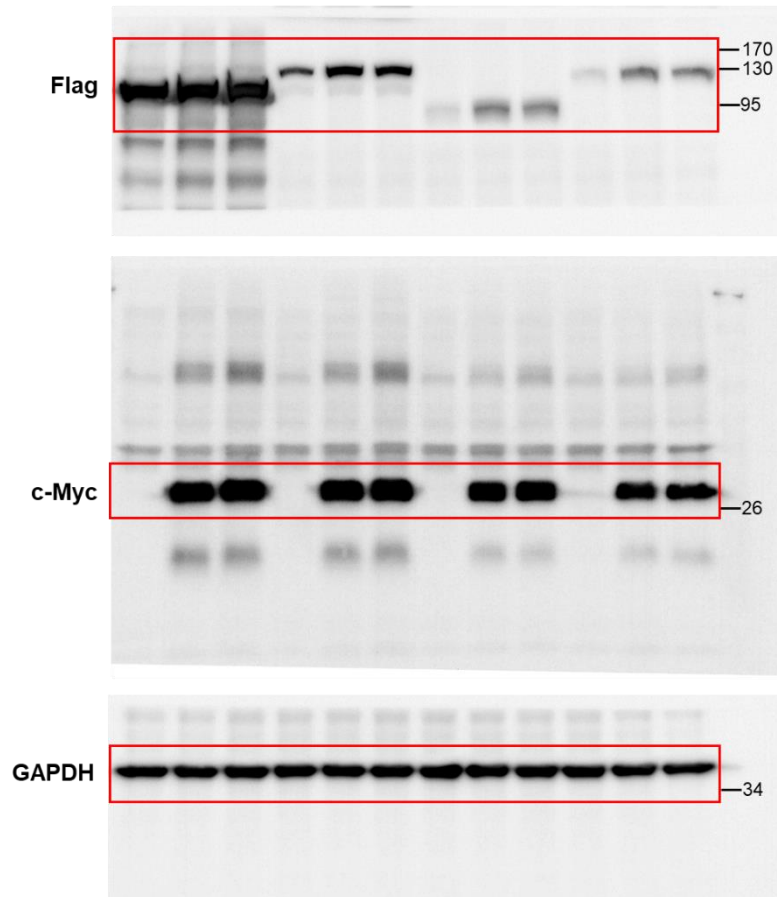

Supplement: JEM_20220727_SourceDataFS3.pdf [file JEM_20220727_SourceDataFS3.pdf]
