# Supplementary material for: The Src–ZNRF1 axis controls TLR3 trafficking and interferon responses to limit lung barrier damage
Source: PubMed Central journal article supplement (PMC10174191; doi:10.1084/jem.20220727), 2023-05-09

# Source Data Supplementary Figure 5B

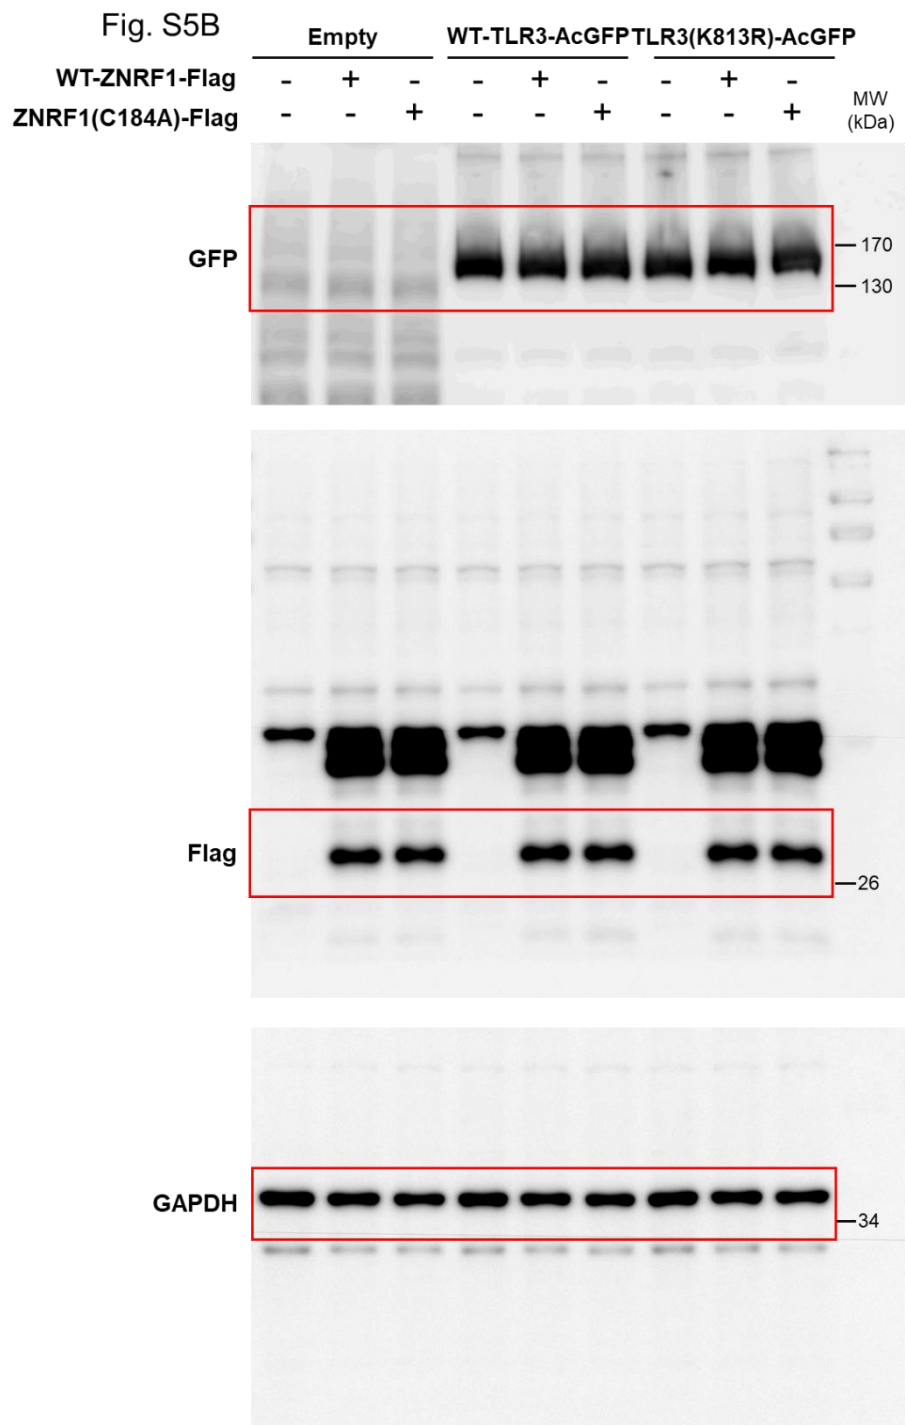

Source Data Supplementary Figure 5C

Fig. S5C

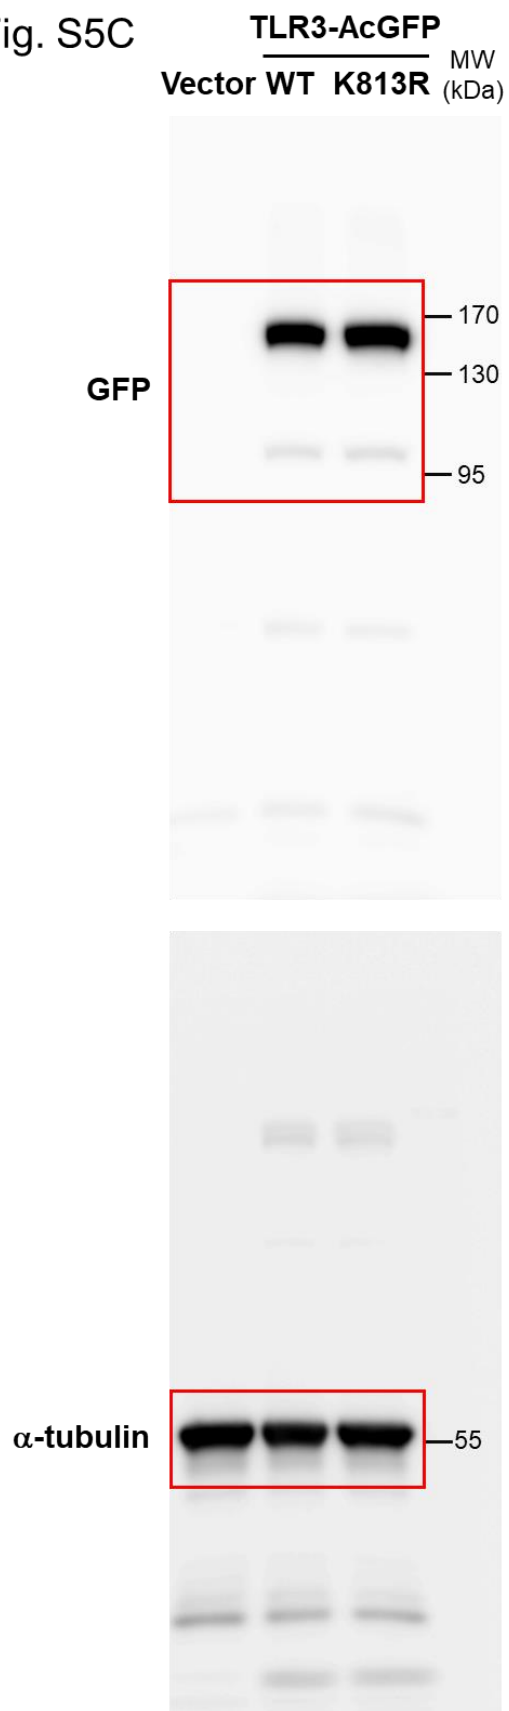

# Source Data Supplementary Figure 5D

## Fig. S5D

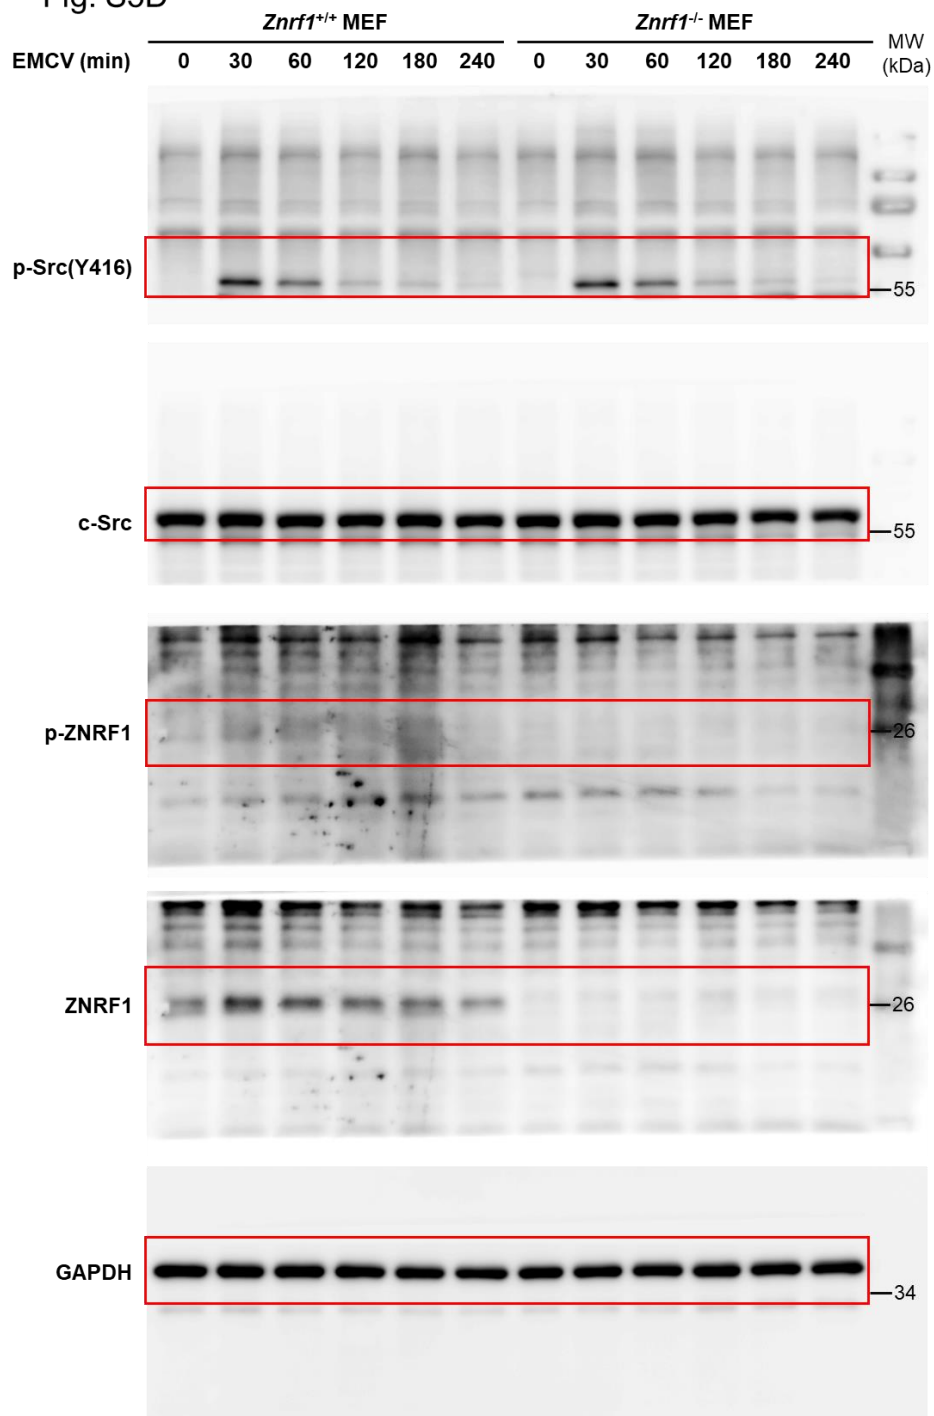

Source Data Supplementary Figure 5E

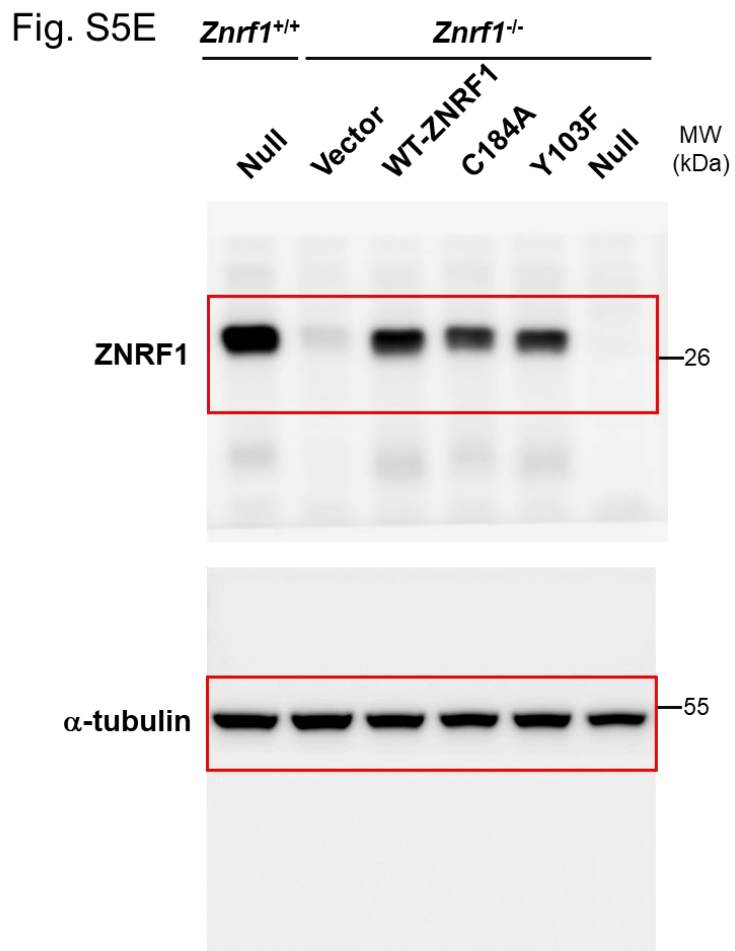

# Source Data Supplementary Figure 5I

Fig. S5I

| Myc-c-Src  | - | - | + | + | + |
|------------|---|---|---|---|---|
| ZNRF1-Flag | - | + | - | + | + |
| polyI:C    | - | - | - | - | + |
| MW (kDa)   |   |   |   |   |   |

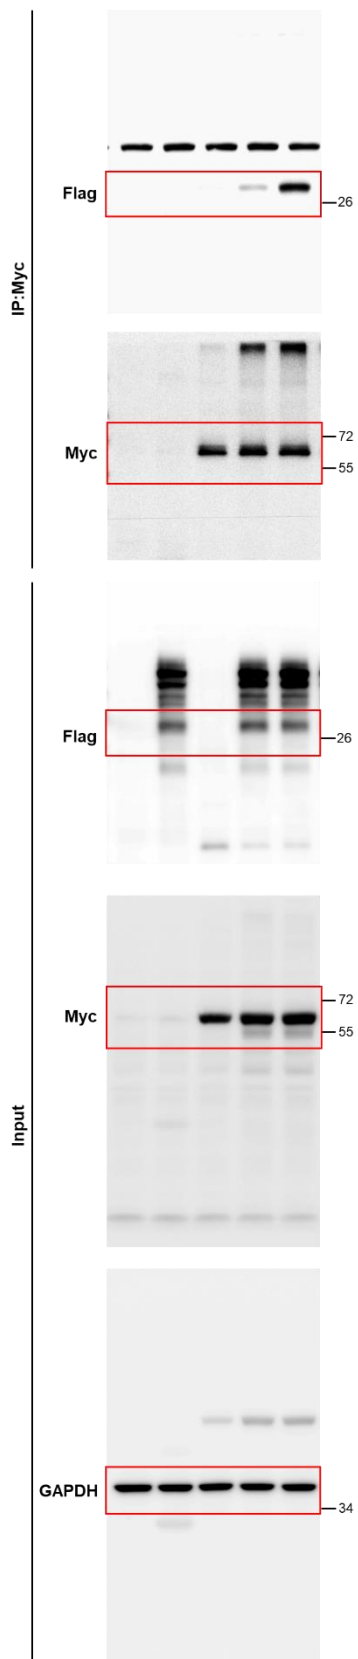

# Source Data Supplementary Figure 5J

Fig. S5J

|            |   |   |   |   |   |       |
|------------|---|---|---|---|---|-------|
| Myc-c-Src  | - | - | + | + | + |       |
| ZNRF1-Flag | - | + | - | + | + | MW    |
| polyI:C    | - | - | - | - | + | (kDa) |

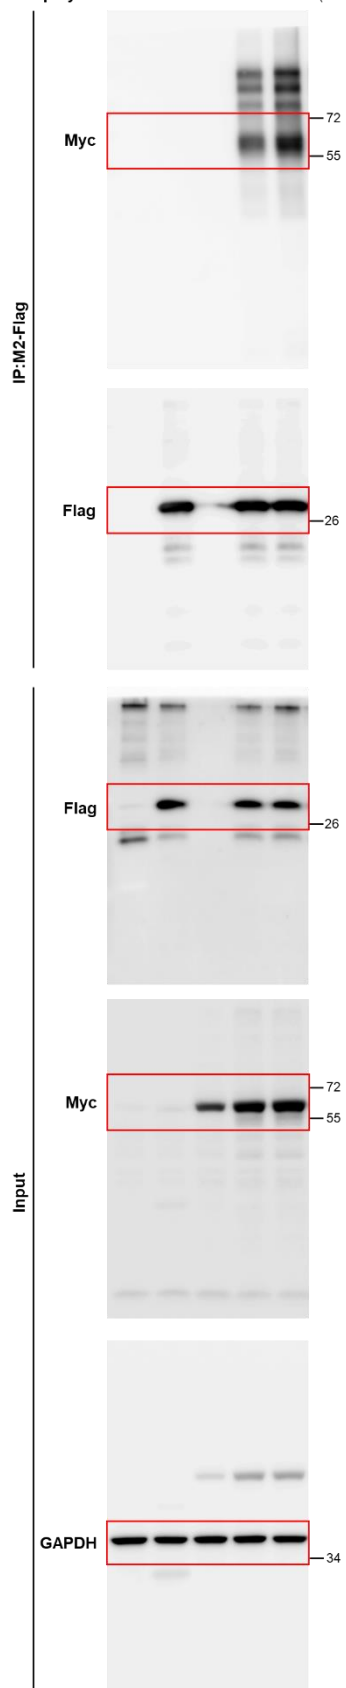

Supplement: JEM_20220727_SourceDataFS5.pdf [file JEM_20220727_SourceDataFS5.pdf]
